# Supplementary material
Source: PubMed Central journal article supplement (PMC2262958)
Supplement: mbc_E07-07-0666_1.pdf [file mbc_E07-07-0666_1.pdf]

Mutants in this study

ACS1  
ADH2  
ADY2  
AGX1  
ALD2  
ALD3  
ALD4  
ARD1  
ATG8  
ATP1  
ATP18  
ATP2  
ATP3  
CIT1  
CIT2  
COR1  
COX6  
COX7  
COX8  
CTA1  
CTT1  
DDR2  
DOA4  
ETR1  
FAA1  
FBP1  
FMP16  
FMP21  
FMP45  
GAD1  
GAT2  
GID8  
GIS1  
GLK1  
GPD1  
GPG1  
GRE1  
GTT1  
GUT2  
HAP4  
HBT1  
HSP104  
HSP12  
HSP26  
HSP30  
HXX1  
HXT5  
ICL1  
JEN1  
KGD1  
MDH1  
MLS1  
MOH1  
MPM1  
MSC1  
NAT1

NGR1  
ODC1  
OM45  
PAI3  
PBI2  
PCK1  
PNC1  
POR1  
POT1  
PST2  
QCR10  
QCR7  
QCR8  
RBF9  
RIP1  
RTN2  
SDH2  
SDH4  
SDS24  
SFA1  
SIP18  
SNA2  
SNZ1  
SOD2  
SPG1  
SPG3  
SPG4  
SPG5  
SPI1  
SPS100  
TIP1  
UBI4  
XBP1  
YAT1  
YMR31  
YBL048W  
YBR056W  
YBR230C  
YDL218W  
YDR262W  
YGR043C  
YHR097C  
YHR138C  
YLR312C  
YPL230W

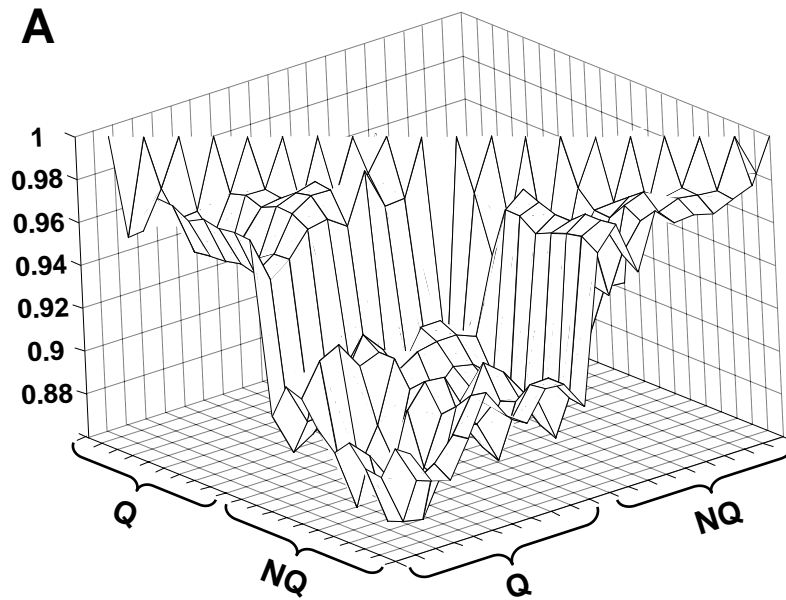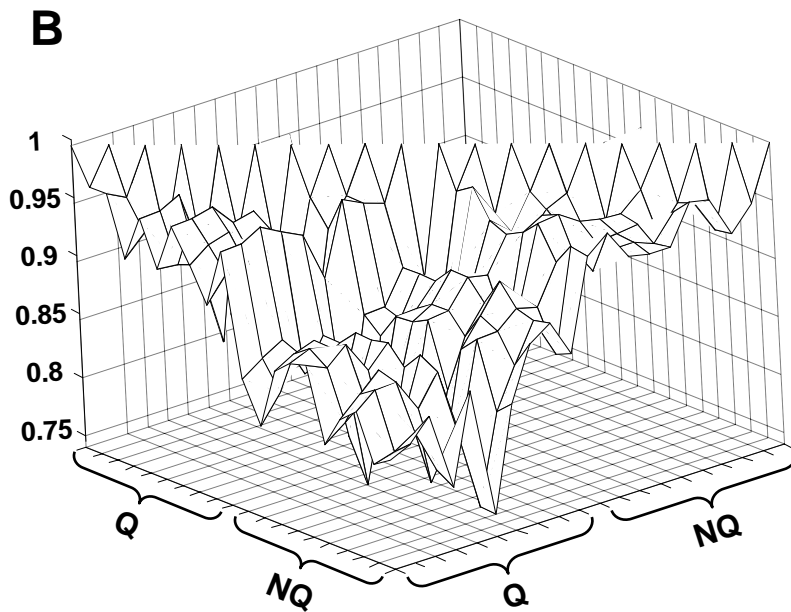

**Correlation plots of gene expression ratios from replicate hybridizations of the Q and NQ fraction.** Correlation was determined using Matlab as described in the Materials and Methods. (A) Correlation map of pair wise  $R^2$  values calculated for all replicate hybridizations of the Q and NQ fractions in the wild-type strain S288c. (B) Correlation map of pair wise  $R^2$  values calculated for all replicate hybridizations of the Q and NQ fractions in the parental strain BY4742.

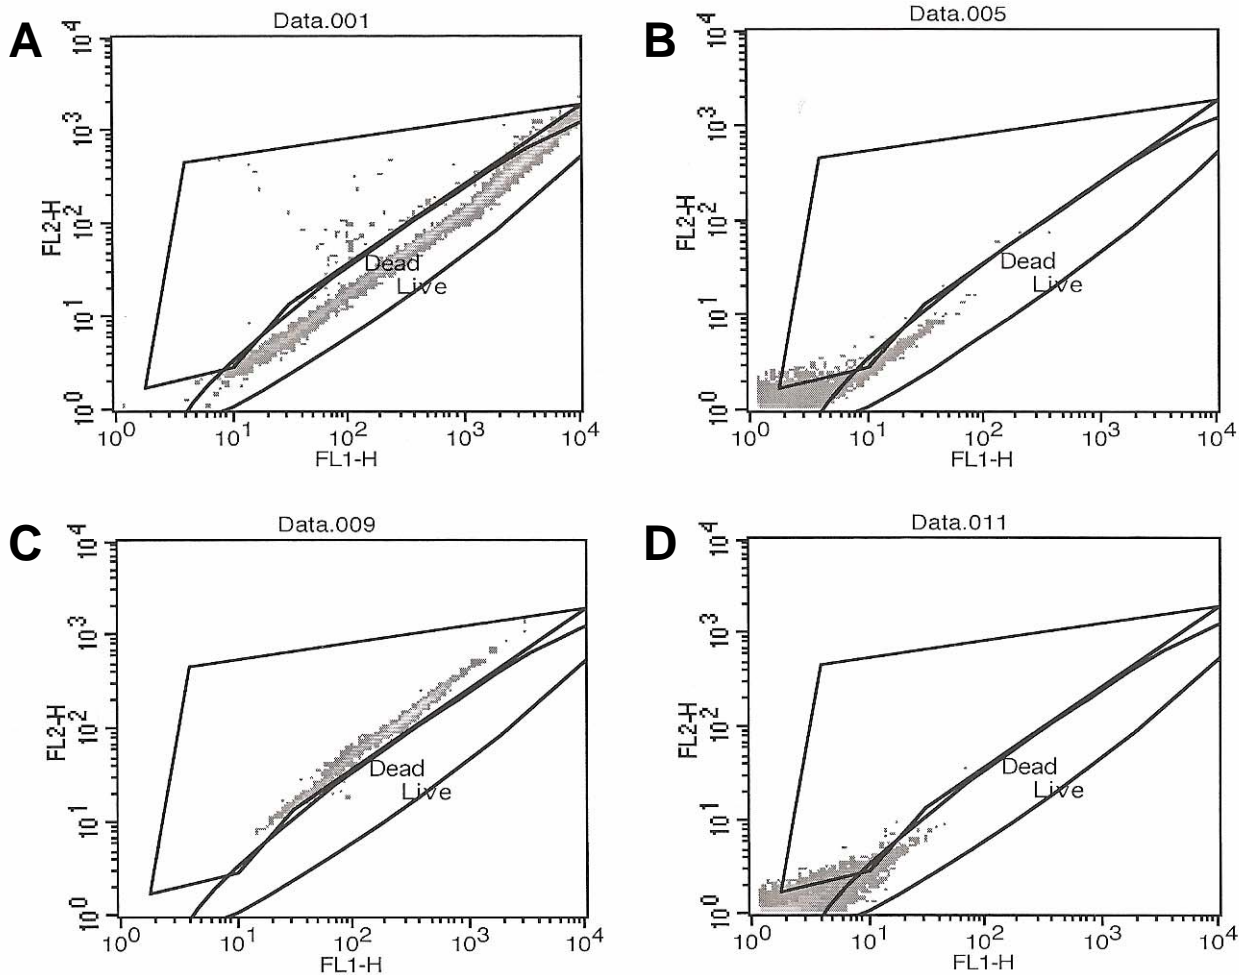

**Flow cytometric viability assay using BY4742 haploid yeast cells.** (A) Stained exponential cells grown overnight, positive viability control. (B) Unstained exponential cells, autofluorescence control. (C) Stained isopropanol “killed” cells from a non-separated stationary-phase culture, negative viability control. (D) Unstained isopropanol “killed” cells from a non-separated stationary-phase culture, autofluorescence control.

|             |           |           |           |           |         |
|-------------|-----------|-----------|-----------|-----------|---------|
| Q gene list | YDL085W   | YDR256C   | YFL005W   | YGR161C   | YIL037C |
| YAL001C     | YDL091C   | YDR311W   | YFL014W   | YGR174C   | YIL041W |
| YAL008W     | YDL110C   | YDR320C   | YFL033C   | YGR180C   | YIL048W |
| YAL049C     | YDL112W   | YDR330W   | YFL043C   | YGR181W   | YIL051C |
| YAL051W     | YDL113C   | YDR331W   | YFL048C   | YGR193C   | YIL057C |
| YAL056W     | YDL124W   | YDR358W   | YFR006W   | YGR201C   | YIL068C |
| YAL064W-B   | YDL130W-A | YDR372C   | YFR013W   | YGR202C   | YIL083C |
| YBL001C     | YDL131W   | YDR380W   | YFR014C   | YGR209C   | YIL090W |
| YBL003C     | YDL133C-A | YDR381C-A | YFR032C-A | YGR213C   | YIL095W |
| YBL027W     | YDL133W   | YDR381W   | YGL017W   | YGR218W   | YIL101C |
| YBL048W     | YDL134C   | YDR385W   | YGL030W   | YGR224W   | YIL120W |
| YBL064C     | YDL135C   | YDR397C   | YGL038C   | YGR235C   | YIL124W |
| YBL092W     | YDL136W   | YDR421W   | YGL054C   | YGR236C   | YIL136W |
| YBL108C-A   | YDL137W   | YDR422C   | YGL055W   | YGR237C   | YIL148W |
| YBR004C     | YDL174C   | YDR430C   | YGL068W   | YGR243W   | YIL160C |
| YBR026C     | YDL183C   | YDR435C   | YGL080W   | YGR244C   | YIL161W |
| YBR050C     | YDL184C   | YDR441C   | YGL121C   | YGR256W   | YIR014W |
| YBR056W     | YDL191W   | YDR466W   | YGL144C   | YGR271W   | YIR016W |
| YBR072W     | YDL199C   | YDR471W   | YGL151W   | YGR277C   | YIR017C |
| YBR089C-A   | YDL201W   | YDR477W   | YGL156W   | YHL029C   | YIR037W |
| YBR090C     | YDL203C   | YDR479C   | YGL167C   | YHL034C   | YIR038C |
| YBR094W     | YDL204W   | YDR483W   | YGL190C   | YHL038C   | YIR043C |
| YBR117C     | YDL205C   | YDR490C   | YGL196W   | YHL039W   | YJL001W |
| YBR126C     | YDL206W   | YDR513W   | YGL205W   | YHR008C   | YJL003W |
| YBR129C     | YDL214C   | YDR514C   | YGL231C   | YHR021C   | YJL005W |
| YBR140C     | YDL215C   | YEL004W   | YGL233W   | YHR028C   | YJL016W |
| YBR149W     | YDL218W   | YEL005C   | YGL237C   | YHR037W   | YJL021C |
| YBR150C     | YDL247W-A | YEL011W   | YGR001C   | YHR073W   | YJL026W |
| YBR167C     | YDR017C   | YEL027W   | YGR005C   | YHR075C   | YJL027C |
| YBR189W     | YDR018C   | YEL034W   | YGR008C   | YHR091C   | YJL049W |
| YBR216C     | YDR025W   | YEL035C   | YGR026W   | YHR096C   | YJL070C |
| YBR225W     | YDR032C   | YEL057C   | YGR027C   | YHR103W   | YJL071W |
| YBR230C     | YDR034W-B | YER009W   | YGR032W   | YHR106W   | YJL084C |
| YBR255C-A   | YDR070C   | YER019C-A | YGR042W   | YHR115C   | YJL085W |
| YBR265W     | YDR074W   | YER020W   | YGR043C   | YHR132C   | YJL088W |
| YBR269C     | YDR099W   | YER021W   | YGR052W   | YHR132W-A | YJL096W |
| YBR280C     | YDR120C   | YER022W   | YGR053C   | YHR133C   | YJL099W |
| YBR287W     | YDR122W   | YER027C   | YGR056W   | YHR137W   | YJL141C |
| YBR295W     | YDR154C   | YER028C   | YGR067C   | YHR138C   | YJL142C |
| YBR296C     | YDR155C   | YER030W   | YGR071C   | YHR139C-A | YJL146W |
| YCL001W     | YDR161W   | YER042W   | YGR082W   | YHR155W   | YJL163C |
| YCL032W     | YDR164C   | YER054C   | YGR086C   | YHR158C   | YJL164C |
| YCL033C     | YDR166C   | YER063W   | YGR087C   | YHR160C   | YJL165C |
| YCR007C     | YDR167W   | YER075C   | YGR088W   | YHR164C   | YJL185C |
| YCR030C     | YDR170C   | YER101C   | YGR090W   | YHR165C   | YJL197W |
| YCR079W     | YDR172W   | YER105C   | YGR100W   | YHR171W   | YJL206C |
| YCR083W     | YDR173C   | YER112W   | YGR106C   | YHR186C   | YJL207C |
| YCR094W     | YDR176W   | YER121W   | YGR116W   | YHR187W   | YJR005W |
| YDL019C     | YDR189W   | YER129W   | YGR118W   | YHR195W   | YJR008W |
| YDL022W     | YDR192C   | YER131W   | YGR131W   | YHR198C   | YJR013W |
| YDL027C     | YDR197W   | YER136W   | YGR132C   | YIL017C   | YJR019C |
| YDL028C     | YDR200C   | YER144C   | YGR133W   | YIL024C   | YJR025C |
| YDL049C     | YDR205W   | YER165W   | YGR134W   | YIL030C   | YJR036C |
| YDL064W     | YDR223W   | YER166W   | YGR143W   | YIL033C   | YJR039W |
| YDL072C     | YDR225W   | YER169W   | YGR144W   | YIL034C   | YJR047C |
| YDL078C     | YDR233C   | YER179W   | YGR145W   | YIL035C   | YJR061W |
| YDL083C     | YDR244W   | YER185W   | YGR146C   | YIL036W   | YJR066W |

|           |         |           |           |           |           |
|-----------|---------|-----------|-----------|-----------|-----------|
| YJR085C   | YKR047W | YLR267W   | YMR109W   | YOL052C-A | YOR391C   |
| YJR087W   | YKR065C | YLR268W   | YMR110C   | YOL054W   | YPL004C   |
| YJR090C   | YKR076W | YLR269C   | YMR118C   | YOL059W   | YPL016W   |
| YJR094W-A | YKR084C | YLR270W   | YMR119W-A | YOL062C   | YPL028W   |
| YJR099W   | YKR089C | YLR271W   | YMR126C   | YOL065C   | YPL036W   |
| YJR104C   | YKR094C | YLR272C   | YMR139W   | YOL071W   | YPL050C   |
| YJR122W   | YKR096W | YLR273C   | YMR143W   | YOL083W   | YPL054W   |
| YJR125C   | YKR102W | YLR275W   | YMR152W   | YOL084W   | YPL069C   |
| YJR134C   | YLL018C | YLR284C   | YMR160W   | YOL086C   | YPL079W   |
| YJR135W-A | YLL040C | YLR289W   | YMR162C   | YOL087C   | YPL081W   |
| YJR136C   | YLL041C | YLR304C   | YMR165C   | YOL096C   | YPL085W   |
| YJR138W   | YLL050C | YLR321C   | YMR169C   | YOL121C   | YPL096C-A |
| YKL002W   | YLL057C | YLR330W   | YMR174C   | YOL127W   | YPL098C   |
| YKL006C-A | YLR006C | YLR331C   | YMR175W   | YOL145C   | YPL099C   |
| YKL007W   | YLR007W | YLR337C   | YMR207C   | YOL146W   | YPL100W   |
| YKL010C   | YLR010C | YLR345W   | YMR208W   | YOL147C   | YPL113C   |
| YKL013C   | YLR021W | YLR350W   | YMR209C   | YOL162W   | YPL123C   |
| YKL015W   | YLR030W | YLR352W   | YMR218C   | YOR005C   | YPL125W   |
| YKL034W   | YLR031W | YLR356W   | YMR223W   | YOR019W   | YPL127C   |
| YKL060C   | YLR033W | YLR362W   | YMR224C   | YOR031W   | YPL128C   |
| YKL061W   | YLR043C | YLR406C   | YMR230W   | YOR034C   | YPL140C   |
| YKL065C   | YLR044C | YLR414C   | YMR231W   | YOR036W   | YPL143W   |
| YKL072W   | YLR045C | YLR417W   | YMR232W   | YOR069W   | YPL145C   |
| YKL093W   | YLR052W | YLR425W   | YMR238W   | YOR070C   | YPL147W   |
| YKL107W   | YLR054C | YLR440C   | YMR246W   | YOR092W   | YPL149W   |
| YKL121W   | YLR056W | YLR448W   | YMR284W   | YOR093C   | YPL183W-A |
| YKL124W   | YLR068W | YLR454W   | YMR287C   | YOR099W   | YPL185W   |
| YKL125W   | YLR069C | YML004C   | YMR295C   | YOR109W   | YPL186C   |
| YKL133C   | YLR070C | YML006C   | YMR304W   | YOR110W   | YPL203W   |
| YKL135C   | YLR072W | YML024W   | YMR315W   | YOR122C   | YPL219W   |
| YKL137W   | YLR075W | YML047W-A | YNL015W   | YOR125C   | YPL222W   |
| YKL142W   | YLR079W | YML054C   | YNL031C   | YOR165W   | YPL223C   |
| YKL149C   | YLR080W | YML061C   | YNL048W   | YOR168W   | YPL225W   |
| YKL150W   | YLR081W | YML065W   | YNL053W   | YOR173W   | YPL228W   |
| YKL162C   | YLR099C | YML072C   | YNL121C   | YOR175C   | YPL230W   |
| YKL162C-A | YLR106C | YML073C   | YNL131W   | YOR176W   | YPL243W   |
| YKL163W   | YLR118C | YML075C   | YNL189W   | YOR177C   | YPL265W   |
| YKL173W   | YLR119W | YML086C   | YNL193W   | YOR180C   | YPL280W   |
| YKL174C   | YLR120C | YML088W   | YNL208W   | YOR181W   | YPR006C   |
| YKL179C   | YLR134W | YML128C   | YNL211C   | YOR185C   | YPR026W   |
| YKL188C   | YLR136C | YMR018W   | YNL212W   | YOR186W   | YPR028W   |
| YKL189W   | YLR148W | YMR029C   | YNL213C   | YOR209C   | YPR029C   |
| YKL203C   | YLR149C | YMR033W   | YNL219C   | YOR214C   | YPR030W   |
| YKL214C   | YLR164W | YMR034C   | YNL256W   | YOR215C   | YPR043W   |
| YKL217W   | YLR165C | YMR035W   | YNL257C   | YOR228C   | YPR052C   |
| YKL219W   | YLR166C | YMR036C   | YNL261W   | YOR230W   | YPR055W   |
| YKL220C   | YLR178C | YMR041C   | YNL270C   | YOR234C   | YPR056W   |
| YKL221W   | YLR194C | YMR072W   | YNL302C   | YOR273C   | YPR084W   |
| YKR001C   | YLR206W | YMR085W   | YNL317W   | YOR275C   | YPR098C   |
| YKR009C   | YLR213C | YMR090W   | YNL325C   | YOR285W   | YPR132W   |
| YKR017C   | YLR231C | YMR091C   | YNR006W   | YOR291W   | YPR134W   |
| YKR018C   | YLR239C | YMR095C   | YNR011C   | YOR328W   | YPR151C   |
| YKR024C   | YLR241W | YMR096W   | YNR059W   | YOR329C   | YPR165W   |
| YKR029C   | YLR248W | YMR097C   | YOL016C   | YOR336W   | YPR172W   |
| YKR031C   | YLR250W | YMR099C   | YOL024W   | YOR340C   | YPR189W   |
| YKR035W-A | YLR265C | YMR101C   | YOL025W   | YOR374W   | YPR192W   |
| YKR046C   | YLR266C | YMR107W   | YOL044W   | YOR385W   | YPR200C   |

|                                                                            | Probability |
|----------------------------------------------------------------------------|-------------|
| Quiescent                                                                  |             |
| vesicle-mediated transport                                                 | 1.29E-09    |
| vesicle docking during exocytosis                                          | 2.77E-06    |
| oxygen and reactive oxygen species metabolism                              | 9.11E-06    |
| vesicle docking                                                            | 9.41E-06    |
| fatty acid oxidation                                                       | 1.22E-05    |
| exocytosis                                                                 | 1.55E-05    |
| membrane organization and biogenesis                                       | 2.05E-05    |
| response to oxidative stress                                               | 2.07E-05    |
| membrane fusion                                                            | 7.46E-05    |
| lipid metabolism                                                           | 9.20E-05    |
| cellular lipid metabolism                                                  | 9.55E-05    |
| signal transduction                                                        | 9.67E-05    |
| establishment of localization                                              | 0.0001      |
| transport                                                                  | 0.00011     |
| post-Golgi vesicle-mediated transport                                      | 0.00013     |
| Golgi to plasma membrane transport                                         | 0.00014     |
| secretion                                                                  | 0.00014     |
| cell communication                                                         | 0.00016     |
| fatty acid beta-oxidation                                                  | 0.00023     |
| bipolar bud site selection                                                 | 0.00027     |
| localization                                                               | 0.00027     |
| Golgi vesicle transport                                                    | 0.00031     |
| secretory pathway                                                          | 0.00034     |
| endocytosis                                                                | 0.0004      |
| response to stress                                                         | 0.00049     |
| cellular localization                                                      | 0.00065     |
| reproduction                                                               | 0.00066     |
| cell organization and biogenesis                                           | 0.00077     |
| physiological process                                                      | 0.00087     |
| fatty acid metabolism                                                      | 0.00092     |
| intracellular transport                                                    | 0.00106     |
| establishment of cellular localization                                     | 0.00112     |
| protein modification                                                       | 0.00113     |
| regulation of protein metabolism                                           | 0.0013      |
| response to stimulus                                                       | 0.00135     |
| cell wall organization and biogenesis (sensu Fungi)                        | 0.00153     |
| cellular process                                                           | 0.00164     |
| actin polymerization and/or depolymerization                               | 0.00175     |
| response to abiotic stimulus                                               | 0.00199     |
| cellular physiological process                                             | 0.00242     |
| biopolymer biosynthesis                                                    | 0.00243     |
| vesicle fusion                                                             | 0.00243     |
| polysaccharide biosynthesis                                                | 0.00243     |
| ethanol metabolism                                                         | 0.00275     |
| glucan biosynthesis                                                        | 0.00314     |
| cell wall biosynthesis                                                     | 0.00314     |
| cell wall biosynthesis (sensu Fungi)                                       | 0.00314     |
| cell wall polysaccharide biosynthesis (sensu Fungi)                        | 0.00321     |
| protein localization                                                       | 0.00336     |
| endosome transport                                                         | 0.00362     |
| regulation of translational fidelity                                       | 0.00411     |
| response to chemical stimulus                                              | 0.00436     |
| establishment of protein localization                                      | 0.00436     |
| age-dependent response to oxidative stress during chronological cell aging | 0.00455     |
| age-dependent general metabolic decline during chronological cell aging    | 0.00455     |
| age-dependent response to oxidative stress                                 | 0.00455     |
| asexual reproduction                                                       | 0.00487     |
| cell budding                                                               | 0.00487     |

|                                                                                   |         |
|-----------------------------------------------------------------------------------|---------|
| intracellular protein transport                                                   | 0.00496 |
| lipid biosynthesis                                                                | 0.00511 |
| Ras protein signal transduction                                                   | 0.00584 |
| Golgi to endosome transport                                                       | 0.00588 |
| protein amino acid phosphorylation                                                | 0.00645 |
| regulation of proteolysis                                                         | 0.00661 |
| actin filament depolymerization                                                   | 0.00661 |
| beta-1,6 glucan biosynthesis                                                      | 0.00661 |
| protein transport                                                                 | 0.00711 |
| beta-glucan biosynthesis                                                          | 0.00723 |
| age-dependent general metabolic decline                                           | 0.00723 |
| cellular polysaccharide metabolism                                                | 0.00755 |
| polysaccharide metabolism                                                         | 0.00755 |
| cell wall organization and biogenesis                                             | 0.00774 |
| external encapsulating structure organization and biogenesis                      | 0.00774 |
| cell aging                                                                        | 0.00831 |
| phosphate metabolism                                                              | 0.00929 |
| phosphorus metabolism                                                             | 0.00929 |
| carbohydrate biosynthesis                                                         | 0.00955 |
| aging                                                                             | 0.00964 |
| steroid biosynthesis                                                              | 0.01071 |
| beta-glucan metabolism                                                            | 0.01077 |
| regulation of cellular biosynthesis                                               | 0.01121 |
| regulation of biosynthesis                                                        | 0.01121 |
| intracellular signaling cascade                                                   | 0.01179 |
| beta-1,6 glucan metabolism                                                        | 0.01206 |
| glucose catabolism to ethanol                                                     | 0.01206 |
| protein retention in Golgi                                                        | 0.01229 |
| coenzyme metabolism                                                               | 0.01277 |
| development                                                                       | 0.01304 |
| actin filament organization                                                       | 0.014   |
| ubiquitin-dependent protein catabolism via the multivesicular body pathway        | 0.01435 |
| regulation of cell redox homeostasis                                              | 0.01527 |
| response to desiccation                                                           | 0.01527 |
| cell redox homeostasis                                                            | 0.01527 |
| response to water                                                                 | 0.01527 |
| response to water deprivation                                                     | 0.01527 |
| aromatic amino acid family catabolism                                             | 0.01548 |
| actin filament capping                                                            | 0.01548 |
| age-dependent response to reactive oxygen species during chronological cell aging | 0.01548 |
| age-dependent response to reactive oxygen species                                 | 0.01548 |
| barbed-end actin filament capping                                                 | 0.01548 |
| regulation of actin filament depolymerization                                     | 0.01548 |
| regulation of cell shape                                                          | 0.01548 |
| negative regulation of actin filament depolymerization                            | 0.01548 |
| regulation of translation                                                         | 0.01617 |
| glucan metabolism                                                                 | 0.01669 |
| late endosome to vacuole transport                                                | 0.01839 |
| cortical cytoskeleton organization and biogenesis                                 | 0.01839 |
| cortical actin cytoskeleton organization and biogenesis                           | 0.01839 |
| regulation of protein biosynthesis                                                | 0.01884 |
| cell death                                                                        | 0.0189  |
| glycolytic fermentation                                                           | 0.01948 |
| carbohydrate metabolism                                                           | 0.01987 |
| protein targeting                                                                 | 0.02007 |
| maintenance of protein localization                                               | 0.02093 |
| actin cytoskeleton organization and biogenesis                                    | 0.02104 |
| death                                                                             | 0.02134 |
| dephosphorylation                                                                 | 0.02182 |

|                                                                       |         |
|-----------------------------------------------------------------------|---------|
| energy reserve metabolism                                             | 0.02182 |
| MAPKKK cascade                                                        | 0.02311 |
| regulation of physiological process                                   | 0.02327 |
| vacuole fusion, non-autophagic                                        | 0.02704 |
| cell adhesion                                                         | 0.02856 |
| maintenance of localization                                           | 0.02859 |
| actin filament-based process                                          | 0.02866 |
| peroxisome organization and biogenesis                                | 0.02874 |
| trehalose metabolism                                                  | 0.0289  |
| plasma membrane organization and biogenesis                           | 0.0289  |
| phospholipid translocation                                            | 0.0289  |
| copper ion homeostasis                                                | 0.0289  |
| regulation of transcription from RNA polymerase III promoter          | 0.0289  |
| response to reactive oxygen species                                   | 0.0289  |
| regulation of biological process                                      | 0.03156 |
| generation of precursor metabolites and energy                        | 0.03158 |
| lipid transport                                                       | 0.03202 |
| reproductive cellular physiological process                           | 0.03266 |
| reproductive physiological process                                    | 0.03266 |
| formation of catalytic spliceosome for first transesterification step | 0.03278 |
| regulation of actin polymerization and/or depolymerization            | 0.03278 |
| aromatic compound catabolism                                          | 0.03278 |
| regulation of actin filament length                                   | 0.03278 |
| phosphorylation                                                       | 0.03339 |
| cofactor metabolism                                                   | 0.03416 |
| biopolymer modification                                               | 0.03486 |
| cytokinesis, site selection                                           | 0.03507 |
| bud site selection                                                    | 0.03507 |
| chronological cell aging                                              | 0.03519 |
| steroid metabolism                                                    | 0.03542 |
| small GTPase mediated signal transduction                             | 0.03709 |
| replicative cell aging                                                | 0.03796 |
| oxidoreduction coenzyme metabolism                                    | 0.03956 |
| reproductive sporulation                                              | 0.04017 |
| sporulation (sensu Fungi)                                             | 0.04017 |
| cell cycle arrest in response to pheromone                            | 0.04033 |
| cell wall chitin metabolism                                           | 0.04033 |
| protein depolymerization                                              | 0.04033 |
| protein kinase cascade                                                | 0.04173 |
| vacuole organization and biogenesis                                   | 0.04174 |
| energy derivation by oxidation of organic compounds                   | 0.0422  |
| cellular macromolecule metabolism                                     | 0.04259 |
| protein amino acid dephosphorylation                                  | 0.04369 |
| actin cortical patch assembly                                         | 0.04408 |
| regulation of cellular physiological process                          | 0.04441 |
| protein targeting to vacuole                                          | 0.04564 |
| regulation of cellular process                                        | 0.04568 |
| cell division                                                         | 0.04607 |
| cellular carbohydrate metabolism                                      | 0.04654 |
| morphogenesis                                                         | 0.05078 |
| cellular morphogenesis                                                | 0.05078 |
| growth                                                                | 0.05096 |
| protein import into mitochondrial inner membrane                      | 0.0537  |
| nonprotein amino acid metabolism                                      | 0.0537  |
| negative regulation of protein metabolism                             | 0.0537  |
| protein targeting to peroxisome                                       | 0.05412 |
| osmosensory signaling pathway                                         | 0.05412 |
| MAPKKK cascade during cell wall biogenesis                            | 0.05485 |
| N-glycan processing                                                   | 0.05485 |



|                                                         |         |
|---------------------------------------------------------|---------|
| proline catabolism                                      | 0.05485 |
| disaccharide biosynthesis                               | 0.05485 |
| trehalose biosynthesis                                  | 0.05485 |
| fatty acid transport                                    | 0.05485 |
| sporulation                                             | 0.05506 |
| mitochondrial genome maintenance                        | 0.0577  |
| cytokinesis                                             | 0.06098 |
| pyridine nucleotide metabolism                          | 0.06221 |
| cell differentiation                                    | 0.06249 |
| nitrogen compound catabolism                            | 0.07412 |
| sterol biosynthesis                                     | 0.07412 |
| amine catabolism                                        | 0.07412 |
| retrograde vesicle-mediated transport, Golgi to ER      | 0.07749 |
| response to heat                                        | 0.07755 |
| fermentation                                            | 0.07755 |
| negative regulation of biological process               | 0.07929 |
| ubiquitin cycle                                         | 0.08037 |
| negative regulation of cell organization and biogenesis | 0.08071 |
| endoplasmic reticulum organization and biogenesis       | 0.08071 |
| peptide or protein carboxyl-terminal blocking           | 0.08071 |
| propionate metabolism                                   | 0.08071 |
| metabolism                                              | 0.08142 |
| negative regulation of cellular process                 | 0.08358 |
| negative regulation of cellular physiological process   | 0.08358 |
| regulation of cell growth                               | 0.08584 |
| chitin metabolism                                       | 0.08584 |
| cell cycle arrest                                       | 0.08584 |
| negative regulation of progression through cell cycle   | 0.08584 |
| organic acid metabolism                                 | 0.08664 |
| carboxylic acid metabolism                              | 0.08664 |
| ergosterol metabolism                                   | 0.08838 |
| ergosterol biosynthesis                                 | 0.08838 |
| filamentous growth                                      | 0.09108 |
| negative regulation of physiological process            | 0.09153 |
| regulation of metabolism                                | 0.09165 |
| transcription initiation                                | 0.0917  |
| Not yet annotated                                       |         |

|              |           |           |           |           |           |
|--------------|-----------|-----------|-----------|-----------|-----------|
| NQ gene list | YCR002C   | YDR261W-A | YER103W   | YGR157W   | YIL019W   |
| YAL004W      | YCR008W   | YDR261W-B | YER116C   | YGR161C-D | YIL047C   |
| YAL012W      | YCR018C-A | YDR265W   | YER124C   | YGR161W-A | YIL059C   |
| YAL020C      | YCR021C   | YDR266C   | YER138C   | YGR161W-B | YIL080W   |
| YAL023C      | YCR038W-A | YDR267C   | YER138W-A | YGR164W   | YIL082W   |
| YAL039C      | YCR039C   | YDR271C   | YER139C   | YGR165W   | YIL106W   |
| YAL040C      | YCR040W   | YDR273W   | YER146W   | YGR170W   | YIL108W   |
| YAL042W      | YCR059C   | YDR277C   | YER148W   | YGR171C   | YIL111W   |
| YAL058W      | YCR096C   | YDR297W   | YER149C   | YGR172C   | YIL118W   |
| YAR018C      | YDL007W   | YDR306C   | YER150W   | YGR173W   | YIL121W   |
| YAR028W      | YDL012C   | YDR309C   | YER151C   | YGR177C   | YIL123W   |
| YAR029W      | YDL047W   | YDR316W   | YER152C   | YGR185C   | YIL144W   |
| YAR031W      | YDL054C   | YDR316W-A | YER158C   | YGR189C   | YIL152W   |
| YAR068W      | YDL057W   | YDR316W-B | YER159C   | YGR198W   | YIL162W   |
| YBL005W-A    | YDL065C   | YDR327W   | YER160C   | YGR199W   | YIL169C   |
| YBL005W-B    | YDL066W   | YDR342C   | YER161C   | YGR204W   | YIR018W   |
| YBL010C      | YDL069C   | YDR343C   | YER163C   | YGR205W   | YIR029W   |
| YBL021C      | YDL070W   | YDR344C   | YER172C   | YGR210C   | YIR039C   |
| YBL029C-A    | YDL071C   | YDR345C   | YER173W   | YGR211W   | YJL034W   |
| YBL033C      | YDL095W   | YDR349C   | YFL002W-A | YGR222W   | YJL037W   |
| YBL043W      | YDL100C   | YDR353W   | YFL002W-B | YGR242W   | YJL079C   |
| YBL045C      | YDL165W   | YDR354W   | YFL016C   | YGR253C   | YJL082W   |
| YBL046W      | YDL213C   | YDR355C   | YFL021W   | YGR278W   | YJL091C   |
| YBL061C      | YDL230W   | YDR356W   | YFL022C   | YGR279C   | YJL102W   |
| YBL086C      | YDL231C   | YDR363W-A | YFL036W   | YGR280C   | YJL143W   |
| YBL093C      | YDL232W   | YDR365C   | YFL037W   | YGR289C   | YJL156W-A |
| YBL101W-A    | YDR009W   | YDR365W-B | YFL050C   | YHL007C   | YJL158C   |
| YBL101W-B    | YDR034C-A | YDR366C   | YFL054C   | YHL008C   | YJL184W   |
| YBL107W-A    | YDR034C-C | YDR391C   | YFR026C   | YHL009W-B | YJL199C   |
| YBR012C      | YDR034C-D | YDR406W   | YFR053C   | YHL021C   | YJR017C   |
| YBR012W-B    | YDR037W   | YDR408C   | YGL008C   | YHL026C   | YJR027W   |
| YBR013C      | YDR041W   | YDR423C   | YGL012W   | YHL036W   | YJR029W   |
| YBR014C      | YDR044W   | YDR433W   | YGL035C   | YHR009C   | YJR030C   |
| YBR063C      | YDR045C   | YDR454C   | YGL058W   | YHR016C   | YJR046W   |
| YBR065C      | YDR046C   | YDR481C   | YGL082W   | YHR020W   | YJR064W   |
| YBR077C      | YDR047W   | YDR502C   | YGL088W   | YHR025W   | YJR073C   |
| YBR078W      | YDR049W   | YDR516C   | YGL096W   | YHR041C   | YJR077C   |
| YBR082C      | YDR079W   | YDR517W   | YGL106W   | YHR043C   | YJR111C   |
| YBR100W      | YDR088C   | YDR518W   | YGL108C   | YHR044C   | YJR117W   |
| YBR101C      | YDR098C-B | YDR527W   | YGL123W   | YHR049W   | YJR148W   |
| YBR105C      | YDR133C   | YDR530C   | YGL163C   | YHR050W   | YKL004W   |
| YBR106W      | YDR151C   | YDR532C   | YGL172W   | YHR064C   | YKL008C   |
| YBR114W      | YDR170W-A | YEL010W   | YGL178W   | YHR071W   | YKL023W   |
| YBR158W      | YDR171W   | YEL012W   | YGL193C   | YHR081W   | YKL043W   |
| YBR161W      | YDR179C   | YEL020W-A | YGL198W   | YHR092C   | YKL044W   |
| YBR162C      | YDR206W   | YEL026W   | YGL203C   | YHR094C   | YKL062W   |
| YBR162W-A    | YDR210C-D | YEL038W   | YGL209W   | YHR102W   | YKL081W   |
| YBR164C      | YDR210W   | YEL039C   | YGL212W   | YHR104W   | YKL082C   |
| YBR177C      | YDR210W-A | YEL047C   | YGL213C   | YHR143W   | YKL101W   |
| YBR183W      | YDR210W-B | YEL065W   | YGL255W   | YHR143W-A | YKL103C   |
| YBR223C      | YDR210W-D | YEL066W   | YGR027W-B | YHR146W   | YKL104C   |
| YBR234C      | YDR211W   | YEL071W   | YGR038C-B | YHR149C   | YKL106C-A |
| YBR290W      | YDR215C   | YER002W   | YGR039W   | YHR152W   | YKL109W   |
| YCL019W      | YDR215C   | YER052C   | YGR048W   | YHR156C   | YKL110C   |
| YCL020W      | YDR232W   | YER053C   | YGR055W   | YHR162W   | YKL120W   |
| YCL021W-A    | YDR234W   | YER062C   | YGR099W   | YHR179W   | YKR011C   |
| YCL022C      | YDR242W   | YER067W   | YGR108W   | YHR199C   | YKR013W   |
| YCL025C      | YDR252W   | YER076C   | YGR122C-A | YHR214C-B | YKR038C   |
| YCL030C      | YDR253C   | YER088C   | YGR124W   | YHR214W-A | YKR040C   |
| YCL050C      | YDR258C   | YER090W   | YGR137W   | YHR216W   | YKR041W   |
| YCL066W      | YDR259C   | YER091C   | YGR142W   | YIL009C-A | YKR042W   |
| YCL067C      | YDR260C   | YER091C-A | YGR151C   | YIL014C-A | YKR043C   |
|              | YDR261C   | YER092W   | YGR156W   | YIL015C-A | YKR045C   |
|              | YDR261C-D |           |           |           |           |

|           |           |           |           |
|-----------|-----------|-----------|-----------|
| YKR062W   | YML081W   | YNL281W   | YOR366W   |
| YKR066C   | YML085C   | YNL284C-A | YOR368W   |
| YKR070W   | YML101C   | YNL284C-B | YOR369C   |
| YKR071C   | YML102W   | YNL285W   | YOR370C   |
| YKR075C   | YML106W   | YNL286W   | YOR375C   |
| YLL026W   | YML117W-A | YNL308C   | YOR381W   |
| YLL038C   | YML119W   | YNR018W   | YOR382W   |
| YLL043W   | YML124C   | YNR043W   | YOR383C   |
| YLR024C   | YML125C   | YNR055C   | YOR394W   |
| YLR035C-A | YML130C   | YOL032W   | YPL001W   |
| YLR036C   | YMR002W   | YOL036W   | YPL014W   |
| YLR059C   | YMR013W-A | YOL068C   | YPL024W   |
| YLR060W   | YMR044W   | YOL069W   | YPL025C   |
| YLR113W   | YMR045C   | YOL070C   | YPL026C   |
| YLR114C   | YMR046C   | YOL103W   | YPL027W   |
| YLR130C   | YMR046W-A | YOL103W-B | YPL034W   |
| YLR142W   | YMR050C   | YOL104C   | YPL038W   |
| YLR153C   | YMR058W   | YOL107W   | YPL055C   |
| YLR154C   | YMR081C   | YOL108C   | YPL066W   |
| YLR155C   | YMR122W-A | YOL113W   | YPL087W   |
| YLR156W   | YMR134W   | YOL128C   | YPL106C   |
| YLR157C   | YMR135C   | YOL155C   | YPL108W   |
| YLR157C-B | YMR158C-B | YOR007C   | YPL144W   |
| YLR158C   | YMR168C   | YOR020C   | YPL155C   |
| YLR159W   | YMR217W   | YOR027W   | YPL213W   |
| YLR160C   | YMR240C   | YOR049C   | YPL237W   |
| YLR162W   | YMR251W   | YOR065W   | YPL239W   |
| YLR175W   | YMR253C   | YOR104W   | YPL245W   |
| YLR176C   | YMR265C   | YOR131C   | YPL257W-B |
| YLR179C   | YMR269W   | YOR132W   | YPL258C   |
| YLR189C   | YMR272C   | YOR136W   | YPL272C   |
| YLR190W   | YMR307W   | YOR142W-B | YPR002C-A |
| YLR216C   | YMR314W   | YOR143C   | YPR013C   |
| YLR217W   | YMR318C   | YOR144C   | YPR033C   |
| YLR224W   | YMR321C   | YOR145C   | YPR061C   |
| YLR225C   | YNL006W   | YOR146W   | YPR062W   |
| YLR227W-B | YNL007C   | YOR153W   | YPR063C   |
| YLR228C   | YNL039W   | YOR154W   | YPR064W   |
| YLR244C   | YNL046W   | YOR155C   | YPR065W   |
| YLR245C   | YNL054W-B | YOR156C   | YPR094W   |
| YLR258W   | YNL058C   | YOR192C-B | YPR109W   |
| YLR259C   | YNL062C   | YOR194C   | YPR113W   |
| YLR285W   | YNL063W   | YOR195W   | YPR114W   |
| YLR286C   | YNL064C   | YOR204W   | YPR137C-B |
| YLR299W   | YNL065W   | YOR210W   | YPR137W   |
| YLR301W   | YNL066W   | YOR235W   | YPR138C   |
| YLR303W   | YNL074C   | YOR247W   | YPR145W   |
| YLR332W   | YNL075W   | YOR248W   | YPR156C   |
| YLR334C   | YNL076W   | YOR257W   | YPR158C-D |
| YLR372W   | YNL077W   | YOR292C   | YPR158W   |
| YLR375W   | YNL101W   | YOR298C-A | YPR158W-B |
| YLR410W-A | YNL130C   | YOR303W   | YPR160W   |
| YLR410W-B | YNL136W   | YOR309C   | YPR174C   |
| YLR411W   | YNL142W   | YOR310C   |           |
| YLR412W   | YNL154C   | YOR326W   |           |
| YLR437C   | YNL155W   | YOR335C   |           |
| YML034W   | YNL167C   | YOR343C-A |           |
| YML038C   | YNL180C   | YOR343C-B |           |
| YML039W   | YNL190W   | YOR343W-A |           |
| YML045W   | YNL191W   | YOR343W-B |           |
| YML046W   | YNL221C   | YOR344C   |           |
| YML051W   | YNL231C   | YOR357C   |           |
| YML052W   | YNL232W   | YOR358W   |           |

| Non-quiescent<br>GO_term                                       | Probability |
|----------------------------------------------------------------|-------------|
| Ty element transposition                                       | 4.19E-29    |
| DNA transposition                                              | 3.01E-27    |
| DNA recombination                                              | 1.94E-19    |
| DNA metabolism                                                 | 2.48E-06    |
| nucleobase, nucleoside, nucleotide and nucleic acid metabolism | 2.46E-05    |
| amino acid metabolism                                          | 6.42E-05    |
| amine metabolism                                               | 8.66E-05    |
| nitrogen compound metabolism                                   | 9.58E-05    |
| asparagine metabolism                                          | 0.00014     |
| protein folding                                                | 0.00016     |
| amino acid and derivative metabolism                           | 0.00028     |
| aspartate family amino acid metabolism                         | 0.00058     |
| cellular response to nitrogen starvation                       | 0.00095     |
| asparagine catabolism                                          | 0.00095     |
| cellular response to nitrogen levels                           | 0.00095     |
| hexose transport                                               | 0.00135     |
| monosaccharide transport                                       | 0.00135     |
| carbohydrate transport                                         | 0.00191     |
| phosphatidylcholine biosynthesis                               | 0.0032      |
| carboxylic acid metabolism                                     | 0.0042      |
| organic acid metabolism                                        | 0.0042      |
| amino acid activation                                          | 0.00459     |
| tRNA aminoacylation                                            | 0.00459     |
| tRNA aminoacylation for protein translation                    | 0.00459     |
| nuclear migration during conjugation with cellular fusion      | 0.00502     |
| regulation of transcription, mating-type specific              | 0.00512     |
| glutamine family amino acid catabolism                         | 0.00542     |
| cellular process                                               | 0.00587     |
| physiological process                                          | 0.00656     |
| sulfur amino acid metabolism                                   | 0.00666     |
| cellular physiological process                                 | 0.00714     |
| siderophore transport                                          | 0.00767     |
| phosphatidylcholine metabolism                                 | 0.00767     |
| snoRNA processing                                              | 0.00923     |
| homologous chromosome segregation                              | 0.00923     |
| regulation of carbohydrate metabolism                          | 0.0108      |
| aspartate family amino acid catabolism                         | 0.01096     |
| karyogamy during conjugation with cellular fusion              | 0.01096     |
| glutamine family amino acid metabolism                         | 0.01229     |
| cellular response to extracellular stimulus                    | 0.01248     |
| cellular response to stimulus                                  | 0.01248     |
| response to starvation                                         | 0.01248     |
| cellular response to starvation                                | 0.01248     |
| cellular response to nutrient levels                           | 0.01248     |
| pyrimidine ribonucleoside metabolism                           | 0.01282     |
| phenylalanyl-tRNA aminoacylation                               | 0.01282     |
| donor selection                                                | 0.01282     |
| cytidine metabolism                                            | 0.01282     |
| GMP metabolism                                                 | 0.01282     |
| sphingolipid metabolism                                        | 0.01287     |
| regulation of transcription from RNA polymerase II promoter    | 0.01781     |
| transcription from RNA polymerase II promoter                  | 0.01836     |
| karyogamy                                                      | 0.01995     |
| regulation of physiological process                            | 0.02126     |
| positive regulation of cellular metabolism                     | 0.02191     |
| positive regulation of metabolism                              | 0.02191     |
| cell separation during cytokinesis                             | 0.02239     |

|                                                                                       |         |
|---------------------------------------------------------------------------------------|---------|
| ceramide metabolism                                                                   | 0.02239 |
| homoserine metabolism                                                                 | 0.02239 |
| cellular metabolism                                                                   | 0.02241 |
| biopolymer metabolism                                                                 | 0.02375 |
| primary metabolism                                                                    | 0.02484 |
| regulation of progression through cell cycle                                          | 0.02511 |
| regulation of cell cycle                                                              | 0.02511 |
| glutamate biosynthesis                                                                | 0.02575 |
| glucose transport                                                                     | 0.0273  |
| histone ubiquitination                                                                | 0.0273  |
| ion transport                                                                         | 0.02801 |
| regulation of biological process                                                      | 0.02857 |
| pigment biosynthesis                                                                  | 0.02911 |
| amino acid biosynthesis                                                               | 0.0301  |
| positive regulation of cellular physiological process                                 | 0.03125 |
| positive regulation of physiological process                                          | 0.03125 |
| positive regulation of cellular process                                               | 0.03125 |
| regulation of metabolism                                                              | 0.03199 |
| amino acid catabolism                                                                 | 0.03379 |
| pigment metabolism                                                                    | 0.03475 |
| protein monoubiquitination                                                            | 0.03475 |
| positive regulation of transcription                                                  | 0.03594 |
| positive regulation of nucleobase, nucleoside, nucleotide and nucleic acid metabolism | 0.03915 |
| nuclear migration, microtubule-mediated                                               | 0.04012 |
| microtubule-based movement                                                            | 0.04012 |
| regulation of exit from mitosis                                                       | 0.04102 |
| negative regulation of gluconeogenesis                                                | 0.04212 |
| sphingoid metabolism                                                                  | 0.04212 |
| negative regulation of carbohydrate metabolism                                        | 0.04212 |
| membrane lipid biosynthesis                                                           | 0.04256 |
| metabolism                                                                            | 0.0434  |
| regulation of cellular physiological process                                          | 0.04415 |
| regulation of cellular process                                                        | 0.04535 |
| cysteine metabolism                                                                   | 0.04595 |
| snoRNA 3'-end processing                                                              | 0.04595 |
| asparagine biosynthesis                                                               | 0.04595 |
| sex determination                                                                     | 0.04793 |
| mating type determination                                                             | 0.04793 |
| methionine metabolism                                                                 | 0.04793 |
| glutamate metabolism                                                                  | 0.04871 |
| cytoskeleton-dependent intracellular transport                                        | 0.04871 |
| inorganic anion transport                                                             | 0.04871 |
| positive regulation of transcription, DNA-dependent                                   | 0.04919 |
| amine catabolism                                                                      | 0.05071 |
| nitrogen compound catabolism                                                          | 0.05071 |
| membrane lipid metabolism                                                             | 0.05155 |
| phosphate transport                                                                   | 0.05439 |
| response to desiccation                                                               | 0.05439 |
| response to water deprivation                                                         | 0.05439 |
| response to water                                                                     | 0.05439 |
| ribonucleoside metabolism                                                             | 0.05439 |
| amine biosynthesis                                                                    | 0.05484 |
| nitrogen compound biosynthesis                                                        | 0.05484 |
| response to nutrient levels                                                           | 0.05549 |
| response to extracellular stimulus                                                    | 0.05549 |
| secondary metabolism                                                                  | 0.05549 |
| response to external stimulus                                                         | 0.05549 |
| metal ion transport                                                                   | 0.05691 |
| positive regulation of biological process                                             | 0.05787 |

|                                                                      |         |
|----------------------------------------------------------------------|---------|
| organelle fusion                                                     | 0.05823 |
| anion transport                                                      | 0.05823 |
| transcription                                                        | 0.05827 |
| sulfur metabolism                                                    | 0.06199 |
| regulation of mitosis                                                | 0.06592 |
| carboxylic acid transport                                            | 0.06592 |
| pyrimidine nucleoside metabolism                                     | 0.06799 |
| pyrimidine salvage                                                   | 0.06799 |
| response to hexose stimulus                                          | 0.06799 |
| response to glucose stimulus                                         | 0.06799 |
| isocitrate metabolism                                                | 0.06799 |
| regulation of gluconeogenesis                                        | 0.06815 |
| chitin metabolism                                                    | 0.06815 |
| aspartate family amino acid biosynthesis                             | 0.06867 |
| transition metal ion transport                                       | 0.06944 |
| negative regulation of transcription from RNA polymerase II promoter | 0.06944 |
| organic acid transport                                               | 0.07201 |
| di-, tri-valent inorganic cation transport                           | 0.07201 |
| glycerophospholipid biosynthesis                                     | 0.07202 |
| meiosis I                                                            | 0.073   |
| regulation of transcription                                          | 0.07409 |
| regulation of cellular metabolism                                    | 0.07545 |
| regulation of transcription, DNA-dependent                           | 0.07632 |
| transcription, DNA-dependent                                         | 0.07768 |
| sphingolipid biosynthesis                                            | 0.08001 |
| glutamine family amino acid biosynthesis                             | 0.08205 |
| G1/S-specific transcription in mitotic cell cycle                    | 0.08333 |
| external encapsulating structure organization and biogenesis         | 0.0841  |
| cell wall organization and biogenesis                                | 0.0841  |
| organelle localization                                               | 0.08521 |
| positive regulation of transcription from RNA polymerase II promoter | 0.08521 |
| response to stimulus                                                 | 0.08694 |
| heterocycle metabolism                                               | 0.09014 |
| alcohol metabolism                                                   | 0.0922  |
| nucleus localization                                                 | 0.09221 |
| nuclear migration                                                    | 0.09221 |
| establishment of nucleus localization                                | 0.09221 |
| organic cation transport                                             | 0.09275 |
| zinc ion transport                                                   | 0.09275 |
| mitochondrial signaling pathway                                      | 0.09275 |
| purine base biosynthesis                                             | 0.09275 |
| response to carbohydrate stimulus                                    | 0.09275 |
| polyol transport                                                     | 0.09275 |
| cytokinesis, completion of separation                                | 0.09275 |
| siderophore-iron transport                                           | 0.09275 |
| ammonium transport                                                   | 0.09275 |
| monosaccharide metabolism                                            | 0.09654 |
| cation transport                                                     | 0.09654 |
| amino acid transport                                                 | 0.09774 |
| drug transport                                                       | 0.0998  |
| telomerase-dependent telomere maintenance                            | 0.0998  |
| DNA damage checkpoint                                                | 0.0998  |
| Not yet annotated                                                    |         |

|           |           |           |           |           |           |           |           |
|-----------|-----------|-----------|-----------|-----------|-----------|-----------|-----------|
| Q         | YML016C   | YMR278W   | YCL041C   | YPL203W   | YGL076C   | YHL033C   | YBR172C   |
| protease  | YGR187C   | YAL060W   | YDR261W-B | YLR078C   | YCR066W   | YGL159W   | YOL068C   |
| gene list | YBR217W   | YBL005W-B | YMR045C   | YKR011C   | YER047C   | YHL008C   | YJR015W   |
| YHR052W   | YGR111W   | YBL042C   | YNL003C   | YHL031C   | YAR027W   | YJL122W   | YGR202C   |
| YHR143W   | YIL077C   | YHR002W   | YGR246C   | YFR049W   | YNL173C   | YER115C   | YBR048W   |
| YER084W   | YCL020W   | YDR234W   | YOR375C   | YJR076C   | YOL052C   | YDL223C   | YJR093C   |
| YPR009W   | YER132C   | YNL213C   | YOR131C   | YOL053W   | YGR087C   | YDL014W   | YGL084C   |
| YIL123W   | YKR037C   | YOR234C   | YOR054C   | YOR338W   | YGR026W   | YBR114W   | YBR264C   |
| YER011W   | YDR216W   | YNL051W   | YPR002W   | YDL248W   | YOL026C   | Q0055     | YGR129W   |
| YFL002W-B | YLR089C   | YNL336W   | YML106W   | YBR222C   | YPL269W   | YJL138C   | YKL100C   |
| YBR138C   | YHR042W   | YGR276C   | YPL135W   | YDR503C   | YOR258W   | YOR004W   | YPL015C   |
| YDR527W   | YER162C   | YIR029W   | YKL046C   | YDR214W   | YOR142W-B | YOR361C   | YJL012C-A |
| YFL034C-A | YGR237C   | YCR071C   | YMR088C   | YIR041W   | YDL243C   | YOL103W-A | YPR026W   |
| YHL011C   | YBR288C   | YNL078W   | YDR121W   | YKR016W   | YOR371C   | YNL054W-B | YPR086W   |
| YER134C   | YGR207C   | YKL107W   | YER160C   | YJL004C   | YPR133W-A | YPL026C   | YFR040W   |
| YMR204C   | YPR013C   | YKL124W   | YOR145C   | YKL096W-A | YJL034W   | YJL042W   | YMR154C   |
| YPR074C   | YPL151C   | YOR381W   | YNL177C   | YBL040C   | YOR065W   | YER023W   | YLR159W   |
| YFL036W   | YOL008W   | YJL158C   | YGL012W   | YDL051W   | YPL178W   | YER137C-A | YGR027W-A |
| YKL009W   | YDL172C   | YCR019W   | YML045W   | YMR158W-A | YHR026W   | YMR311C   | YDL234C   |
| YCL017C   | YPL201C   | YGR137W   | YEL020W-A | YGR218W   | YNL333W   | YFL002W-A | YPL250C   |
| YLR086W   | YNL284C-A | YHR065C   | YDR270W   | YEL026W   | YBR162W-A | YLL001W   | YER061C   |
| YMR058W   | YPR100W   | YJL100W   | YJL065C   | YDR375C   | YPL013C   | YMR193C-A | YJR077C   |
| YPL053C   | YDR306C   | YPL179W   | YKL043W   | YLR227W-B | YPL019C   | YKL005C   | YOR352W   |
| YOR343W-B | YOR164C   | YLR410W-B | YIL018W   | YHR043C   | YDR373W   | YGR373W   | YGL234W   |
| YEL075W-A | YNL032W   | YJL008C   | YPR180W   | YAR010C   | YBL090W   | YDR533C   | YPR030W   |
| YJR062C   | YMR004W   | YJL171C   | YGL111W   | YOL140W   | YPL270W   | YER002W   | YER004W   |
| YOR192C-A | YDR457W   | YKR072C   | YLR298C   | YMR214W   | YGR191W   | YER172C   | YGR135W   |
| YPL207W   | YNL002C   | YOR227W   | YLR074C   | YOR144C   | YPR158C-C | YDR327W   | YOL083W   |
| YGR289C   | YPR109W   | YJR161C   | YOR010C   | YNR055C   | YOR343C-B | YMR035W   | YMR073C   |
| YPL202C   | YEL046C   | YNL231C   | YML039W   | YEL024W   | YGR164W   | YKL175W   | YKL085W   |
| YDR410C   | YGL146C   | YHR025W   | YNL284C-B | YML107C   | YPR158C-D | YNL330C   | YBR302C   |
| YDR294C   | YDR441C   | YMR051C   | YPL011C   | YBL045C   | YGR296W   | YML012W   | YOR075W   |
| YDL169C   | YNL105W   | YGL257C   | YDR297W   | YOR132W   | YML092C   | YAL005C   | YOL048C   |
| YPL243W   | YER062C   | YKL050C   | YBL024W   | YBR068C   | YOL044W   | YHR054C   | YCL057W   |
| YER003C   | YBR272C   | YAR014C   | YGR172C   | YGR138C   | YFR004W   | YDL233W   | YNL265C   |
| YDR023W   | YHR117W   | YDR077W   | YOR385W   | YDR098C-B | YGR020C   | YDR261C-C | YJR072C   |
| YMR308C   | YHR214C-B | YDL021W   | YJL036W   | YGR230W   | YLR077W   | YHR082C   | YDR326C   |
| YMR307W   | YOL049W   | YMR158C-B | YJL183W   | YDR365W-B | YOR136W   | YAL021C   | YJR082C   |
| YGR019W   | YML041C   | YGR210C   | YBL102W   | YML051W   | YPR029C   | YOR130C   | YPR158W-A |
| YDR089W   | YNL067W   | YDL203C   | YNL181W   | YHR071W   | YCR004C   | YAR009C   | YDR287W   |
| YDR152W   | YJR006W   | YGR073C   | YDR238C   | YPR145W   | YBR012W-A | YKL185W   | YGR175C   |
| YLR112W   | YNL168C   | YBL007C   | YDR261C-D | YLR156W   | YHR055C   | YPR063C   | YEL038W   |
| YCL011C   | YPL016W   | YKL058W   | YML098W   | YGL255W   | YOR027W   | YGR167W   | YBR262C   |
| YGR161W-A | YJR016C   | YIR037W   | YLL045C   | YOR143C   | YBR140C   | YMR196W   | YCR091W   |
| YLR432W   | YDR250C   | YBR150C   | YDR034C-D | YNL243W   | YER048W-A | YKL109W   | YML079W   |
| YER124C   | YOR070C   | YKR081C   | YGL167C   | YGR161C-C | YLR093C   | YJR058C   | YBL029C-A |
| YDL245C   | YLR169W   | YDR176W   | YPL195W   | YPL213W   | YHR044C   | YOR061W   | YOR317W   |
| YNL040W   | YBR012W-B | YDR025W   | YLR035C-A | YCL001W   | YIL162W   | YDR051C   | YLR249W   |
| YOR003W   | YJR047C   | YPL173W   | YCL019W   | YOL112W   | YNL281W   | YDR049W   | YPL149W   |
| YMR108W   | YEL045C   | YIL143C   | YIL094C   | YCL030C   | YKL207W   | YJR095W   | YDL096C   |
| YDR341C   | YGL008C   | YBR282W   | YDR255C   | YPL036W   | YGR163W   | YLR155C   | YDR383C   |
| YML131W   | YIR022W   | YPR002C-A | YHR057C   | YLR157C-B | YPL039W   | YGR161C-D | YOR080W   |
| YNL075W   | YDL082W   | YHR049W   | YDR293C   | YGR132C   | YIL023C   | YAL030W   | YML045W-A |
| YNL294C   | YNL157W   | YJL044C   | YBR298C   | YIL125W   | YER081W   | YBL049W   | YER065C   |
| YAL046C   | YIL010W   | YJL041W   | YGL122C   | YLR165C   | YLR118C   | YER138C   | YOR117W   |
| YDL095W   | YGR257C   | YDR210W-B | YPL043W   | YDL143W   | YOR090C   | YMR291W   | YJL144W   |
| YOL070C   | YDR033W   | YHR013C   | YDR305C   | YEL002C   | YGR002C   | YPL247C   | YER186C   |
| YBL046W   | YPL014W   | YOR248W   | YER044C   | YAL064W-B | YLR271W   | YIL157C   | YOL012C   |
| YDR034C-C | YLR286C   | YKL037W   | YLR157C   | YDR210C-C | YER117W   | YKR014C   | YKL003C   |
| YPL226W   | YOR118W   | YPR023C   | YPL156C   | YLR052W   | YER017C   | YKL196C   | YOR069W   |
| YGR200C   | YLR163C   | YOR343C-A | YDR316W-B | YJL189W   | YOL103W-B | YOR347C   | YML120C   |
| YNL306W   | YJR055W   | YDR210C-D | YEL003W   | YDR319C   | YOR163W   | YPL013C   | YHL034C   |
| YOR064C   | YPL184C   | YPR148C   | YDR134C   | YIL172C   | YOR137C   | YOR076C   | YGR295C   |
| YKL197C   | YPL237W   | YBR162C   | YDL017W   | YGL220W   | YGR252W   | YGR178C   | YER159C-A |
| YDR333C   | YER031C   | YGL252C   | YEL044W   | YNL129W   | YMR316W   | YNL008C   | YEL017C-A |
| YJL091C   | YPL064C   | YOR134W   | YMR203W   | YBL075C   | YLR259C   | YOR294W   | YOR124C   |
| YLR018C   | YGR161W-B | YPL048W   | YOR340C   | YMR050C   | YOR142W-A | YJR029W   | YNL135C   |
| YHR214W-A | YLR090W   | YBL101W-B | YPL090C   | YCR024C-A | YHR083W   | YDL120W   | YPR137C-B |
| YNL286W   | YLR097C   | YIL112W   | YPL047W   | YGR110W   | YAR068W   | YCR047C   | YMR041C   |
| YMR216C   | YPR041W   | YGL106W   | YCL040W   | YNL125C   | YBR139W   | YOR057W   | YKL057C   |
| YHR175W   | YPL187W   | YPL257W-B | YGR038C-A | YCL066W   | YDR210W-D | YFR047C   | YBL005W-A |

|           |           |           |           |           |           |           |           |
|-----------|-----------|-----------|-----------|-----------|-----------|-----------|-----------|
| YJL053W   | YHR111W   | YBR157C   | YLL024C   | YHR072W-A | YNL076W   | YMR186W   | YOR357C   |
| YMR272C   | YGR033C   | YLR351C   | YBL108C-A | YNR014W   | YER036C   | YER103W   | YPR156C   |
| YMR221C   | YDL078C   | YGL147C   | YLR174W   | YMR143W   | YKR093W   | YPL001W   | YMR146C   |
| YKL214C   | YOR329C   | YOR173W   | YLR160C   | YML034C-A | YCR033W   | YER153C   | YPL274W   |
| YDR320C-A | YGR239C   | YHR115C   | YGR186W   | YDL005C   | YMR260C   | YLR356W   | YOR046C   |
| YDL159W-A | YOR209C   | YKL034W   | YBR253W   | YER182W   | YOR276W   | YLR038C   | YEL011W   |
| YFR053C   | YGR144W   | YOR323C   | YDL055C   | YGL226C-A | YLR229C   | YDR432W   | YEL106W   |
| YNL093W   | YMR305C   | YKL171W   | YMR297W   | YPR137C-A | YPL231W   | YBR013C   | YDL020C   |
| YMR188C   | YDL195W   | YGL253W   | YHR038W   | YOR150W   | YPR043W   | YGL189C   | YDR019C   |
| YPR106W   | YGL061C   | YPL147W   | YBR056W   | YJL134W   | YMR116C   | YJR135W-A | YBL022C   |
| YCR037C   | YLR256W-A | YPR024W   | YHL050C   | YLR438C-A | YHR024C   | YIL057C   | YCR018C-A |
| YDR204W   | YAL036C   | YNL307C   | YJR123W   | YDR378C   | YPL266W   | YLR009W   | YMR286W   |
| YDR316W-A | YCR095C   | YLR158C   | YER090W   | YAL016W   | YJR046W   | YHL047C   | YDL229W   |
| YER074W   | YPL049C   | YGR027C   | YOR230W   | YLR034C   | YLR099W-A | YGR119C   | YML117W   |
| YBR077C   | YLL041C   | YDL027C   | YML070W   | Q0065     | YKL056C   | YPL214C   | YCR075C   |
| YKL026C   | YGR124W   | YOL121C   | YOL126C   | YGR197C   | YOR362C   | YER155C   | YHR007C   |
| YML040W   | YMR039C   | YNL155W   | YJR101W   | YHR027C   | YMR212C   | YGR105W   | YDL126C   |
| YDL215C   | YNL080C   | YBR241C   | YBR025C   | YKR007W   | YHL007C   | YDR231C   | YHR143W-A |
| YBR146W   | YLR017W   | YGL078C   | YLR122C   | YML085C   | YDR263C   | YDR379C-A | YLR167W   |
| YOR383C   | YGL245W   | YDR453C   | YOL120C   | YKL126W   | YEL027W   | YMR294W   | YGR174C   |
| YBL107C   | YJR080C   | YLR466W   | YKL218C   | YPL183W-A | YNL014W   | YPL240C   | YFR024C   |
| YEL012W   | YLR007W   | YOR306C   | YER010C   | YDR346C   | YDR424C   | YGR181W   | YMR251W-A |
| YPR110C   | YHR188C   | YLL039C   | YDR423C   | YLR079W   | YGR141W   | YOL139C   | YKL176C   |
| YHR018C   | YGL096W   | YBL071W-A | YGL062W   | YNL339C   | YMR095C   | YIR006C   | YPL028W   |
| YJR008W   | YFR052W   | YPR129W   | YKL045W   | YMR222C   | YPL186C   | YPL222W   | YDR272W   |
| YJR026W   | YOL129W   | YNL190W   | YLR113W   | YOR281C   | YBL036C   | YOL151W   | YAL062W   |
| YNL005C   | YDR271C   | YJR156C   | YKL083W   | YCR077C   | YDL123W   | YFL058W   | YKL160W   |
| YHR017W   | YOL096C   | YNL284C   | YKR001C   | YJR103W   | YCR051W   | YDL010W   | YCR081W   |
| YKL103C   | YDL128W   | YLR032W   | YBR270C   | YJR078W   | YMR155W   | YLL049W   | YCR088W   |
| YML116W-A | YOR215C   | YPL063W   | YER175C   | YDR343C   | YBR199W   | YLL014W   | YLR387C   |
| YER064C   | YOR154W   | YCR017C   | YGR095C   | YPR104C   | YMR090W   | YBR052C   | YNL195C   |
| YLL043W   | YPR154W   | YOL040C   | YPR143W   | YKR025W   | YMR029C   | YMR173W   | YAL055W   |
| YNR017W   | YLR392C   | YMR100W   | YJR105W   | YBL088C   | YMR046W-A | YPR004C   | YPR098C   |
| YDR098C-A | YPL221W   | YPR166C   | YPR080W   | YER007C-A | YNL099C   | YDR376W   | YMR027W   |
| YJL205C-A | YGR038C-B | YGL026C   | YML126C   | YKL177W   | YOR147W   | YNL137C   | YIL027C   |
| YLR048W   | YNR035C   | YMR265C   | YLR107W   | YGL164C   | YOR382W   | YGR077C   | YOR007C   |
| YOR192C-B | YGR157W   | YKR100C   | YPR101W   | YDR380W   | YDR284C   | YDR284C   | YDL049C   |
| YKL181W   | YBR005W   | YDR054C   | YDL007W   | YIL069C   | YML073C   | YML073C   | YNR016C   |
| YDR354W   | YHL020C   | YIL144W   | YOR184W   | YAL042W   | YPL198W   | YPL091W   | YAL034C   |
| YMR252C   | YER152C   | YPR158W-B | YHR034C   | YJR027W   | YLR157C-A | YPL234C   | YHL025W   |
| YER100W   | YMR295C   | YDR342C   | YML007W   | YDR463W   | YKR088C   | YDR408C   | YPL084W   |
| YJR014W   | YFR024C-A | YGR070W   | YER138W-A | YMR197C   | YML026C   | YOR286W   | YIL039W   |
| YPL170W   | YGL037C   | YPR069C   | YDR212W   | YOR326W   | YLR227W-A | YLR354C   | YDL083C   |
| YOL116W   | YFL006W   | YFR014C   | YBR101C   | YDR505C   | YOR289W   | YDL113C   | YDR331W   |
| YHR039C-A | YJR075W   | YOL081W   | YDR471W   | YMR165C   | YDR037W   | YOR220W   | YER133W   |
| YML132W   | YJL128C   | YGR279C   | YDR381C-A | YLR355C   | YJL021C   | YPL118W   | YDR047W   |
| YDL004W   | YOR232W   | YKR084C   | YBR169C   | YDR171W   | YCL064C   | YPL004C   | YOL108C   |
| YPL224C   | YLR257W   | YEL058W   | YJL111W   | YIL047C   | YPL265W   | YMR115W   | YAL063C   |
| YPR036W   | YPR182W   | YDR313C   | YDR266C   | YNR049C   | YEL071W   | YNL063W   | YBL099W   |
| YOL017W   | YJL012C   | YDR413C   | YJR121W   | YJL140W   | YBR273C   | YBR274W   | YER024W   |
| YJL217W   | YNL117W   | YHR214C-C | YLR175W   | YPL225W   | YBR036C   | YKL081W   | YMR081C   |
| YDR210W-C | YOR133W   | YNL073W   | YBR268W   | YLR224W   | YGL173C   | YGR106C   | YEL051W   |
| YOR369C   | YBR090C   | YPL268W   | YNL142W   | YPL159C   | YOR370C   | YBR208C   | YDL029W   |
| YJL210W   | YLR262C-A | YDL115C   | YKL151C   | YEL050C   | YJR048W   | YOR223W   | YGR260W   |
| YLL018C   | YOR246C   | YJR028W   | YGL105W   | YLR371W   | YJR139C   | YHR096C   | YDR447C   |
| YBR292C   | YNR032C-A | YMR044W   | YGL043W   | YJL081C   | YOR350C   | YMR022W   | YHR162W   |
| YFL044C   | YGR222W   | YPL092W   | YOR257W   | YJL186W   | YPL031C   | YBR218C   | YHR074W   |
| YDL192W   | YHR053C   | YKL156W   | YDL048C   | YGL208W   | YOR178C   | YOR171C   | YJL101C   |
| YIL056W   | YLR203C   | YIL076W   | YDR158W   | YNR020C   | YNL189W   | YPL169C   | YOL039W   |
| YDL065C   | YCL009C   | YMR193W   | YNL115C   | YNL200C   | YDR063W   | YEL057C   | YHR030C   |
| YBR057C   | YDL173W   | YDR479C   | YDR435C   | YKL028W   | YJL045W   | YJL191W   | YML009C   |
| YOL030W   | YOR332W   | YGR254W   | YOL016C   | YIL059C   | YNL056W   | YPL230W   | YBR095C   |
| YCR009C   | YPR188C   | YDL185W   | YMR314W   | YNL192W   | YML129C   | YKL094W   | YGR235C   |
| YOL073C   | YPR028W   | YJL016W   | YPL079W   | YLR216C   | YOR224C   | YOR146W   | YLL023C   |
| YOR123C   | YKL053C-A | YDL071C   | YNL091W   | YPL215W   | YGR198W   | YKL096W   | YGR007W   |
| YLR109W   | YBR179C   | YLR367W   | YMR315W   | YKR048C   | YER141W   | YOR015W   | YBR158W   |
| YFL045C   | YKL024C   | YNL194C   | YDR178W   | YDR452W   | YGR101W   | YML028W   | YML081C-A |
| YJL093C   | YNL241C   | YMR219W   | YML048W   | YJR034W   | YFR044C   | YDR322C-A | YGL248W   |
| YCR104W   | YNL130C   | YER035W   | YNR028W   | YIL136W   | YJL190C   | YJR044C   | YLL029W   |
| YPL023C   | YDL147W   | YDR365W-A | YDR073W   | YOR394W   | YHR102W   | YJL161W   | YNR018W   |
| YPL218W   | YDL012C   | YOL086C   | YPL106C   | YDL122W   | YGL215W   | YGL161C   | YOR262W   |



|           |           |           |           |           |           |           |           |
|-----------|-----------|-----------|-----------|-----------|-----------|-----------|-----------|
| YOR245C   | YKR013W   | YGL237C   | YCL025C   | YDR265W   | YNL054W-A | YKL027W   | YNL302C   |
| YHR219W   | YPL260W   | YLR407W   | YBL093C   | YOR120W   | YGL191W   | YGL196W   | YOR298C-A |
| YPR088C   | YDL019C   | YGL187C   | YLR467W   | YER019C-A | YDR050C   | YER120W   | YOR091W   |
| YDR405W   | YML001W   | YLR033W   | YJR100C   | YBR017C   | YDR007W   | YDR064W   | YDR388W   |
| YBR173C   | YHL015W   | YIL053W   | YPR108W   | YLL050C   | YAL017W   | YLR406C   | YER128W   |
| YFL039C   | YNR002C   | YOR110W   | YLR410W-A | YBR256C   | YGL135W   | YDR035W   | YDR103W   |
| YHR051W   | YOR155C   | YOR285W   | YIL135C   | YJR094W-A | YGL040C   | YLR068W   | YBR050C   |
| YLR325C   | YDR517W   | YLR220W   | YLR029C   | YHR090C   | YGR193C   | YDR099W   | YMR096W   |
| YNL121C   | YPR192W   | YIL161W   | YCR069W   | YNL016W   | YEL077C   | YLR066W   | YIL046W   |
| YMR089C   | YHR037W   | YOL110W   | YKR065C   | YOR056C   | YMR030W   | YOR081C   | YIL035C   |
| YOR111W   | YOR079W   | YKR097W   | YPL078C   | YOR087W   | YLR139W   | YLR359W   | YLL026W   |
| YGL054C   | YDL135C   | YOR082C   | YBR109C   | YDR173C   | YKL098W   | YKR068C   | YGL198W   |
| YPL223C   | YDR304C   | YGR029W   | YDR003W   | YBR215W   | YMR135C   | YBR084W   | YBL065W   |
| YLR287C-A | YLR197W   | YPL143W   | YGR285C   | YGL219C   | YGR008C   | YBL092W   | YJL079C   |
| YPL098C   | YLR454W   | YDR494W   | YDR208W   | YER096W   | YOR303W   | YBR082C   | YPR115W   |
| YMR114C   | YLR324W   | YJL159W   | YPL089C   | YIL033C   | YPR037C   | YOR182C   | YMR150C   |
| YFL030W   | YBL064C   | YER057C   | YLR172C   | YJL066C   | YMR174C   | YDR510W   | YKL167C   |
| YUR004C   | YGL256W   | YGL038C   | YGR082W   | YHL002W   | YGL112C   | YDR298C   | YKL093W   |
| YAL043C-A | YBR067C   | YGR231C   | YJL165C   | YPL262W   | YKL097C   | YOR100C   | YER088C   |
| YIL071C   | YER167W   | YBL003C   | YDL283C   | YDL047W   | YER079W   | YDR246W   | YBR286W   |
| YKR092C   | YGR067C   | YDR335W   | YCR020C   | YGR161C   | YDR182W   | YDL218W   | YGR267C   |
| YMR173W-A | YNL312W   | YLR080W   | YLR294C   | YGL053W   | YGL166W   | YNL071W   | YGR261C   |
| YBR171W   | YDR243W   | YOR244W   | YDR002W   | YNR001C   | YDR399W   | YDR174W   | YOR256C   |
| YBL087C   | YKL187C   | YGR244C   | YBR181C   | YBR287W   | YKR074W   | YBR290W   | YMR195W   |
| YLL028W   | YKR035W-A | YMR142C   | YBL041W   | YPR052C   | YDR433W   | YGL048C   | YHR001W-A |
| YAL044C   | YCR007C   | YER056C-A | YDR381W   | YDR418W   | YLR065C-A | YER083C   | YKL163W   |
| YHR104W   | YBR296C   | YDR345C   | YKR080W   | YAL008W   | YPL054W   | YBR009C   | YDR434W   |
| YOR273C   | YDR225W   | YNL338W   | YDR022C   | YLR178C   | YDL100C   | YGR192C   | YER161C   |
| YCR020W-B | YJL117W   | YER001W   | YBR189W   | YML075C   | YNL274C   | YNL079C   | YHL001W   |
| YMR034C   | YLR414C   | YDR500C   | YER190W   | YLR075W   | YER021W   | YOR128C   | YGR214W   |
| YNL069C   | YOR259C   | YLR244C   | YDL133C-A | YBR053C   | YGR060W   | YMR242C   | YDR001C   |
| YBR108W   | YLR149C   | YCL056C   | YML063W   | YNL077W   | YGR127W   | YLR202C   | YOR101W   |
| YPR062W   | YGR146C   | YJL026W   | YJR133W   | YOR293W   | YOR277C   | YCL035C   | YOR122C   |
| YER072W   | YHR087W   | YGR034W   | YLR258W   | YPR151C   | YGR037C   | YBR094W   | YDR289C   |
| YMR271C   | YNL239W   | YHR056C   | YOL133W   | YJL155C   | YCR053W   | YMR194W   | YGR130C   |
| YPL087W   | YER148W   | YNL161W   | YER144C   | YHR019C   | YPR035W   | YGR201C   | YKR075C   |
| YMR202W   | YOR309C   | YDR226W   | YMR118C   | YEL039C   | YKR062W   | YGR180C   | YML010W   |
| YIL156W   | YCR046C   | YPR001W   | YDR150W   | YKL152C   | YKL193C   | YKL180W   | YDL174C   |
| YKL047W   | YOR089C   | YPL061W   | YPL057C   | YML042W   | YOR141C   | YJL089W   | YHR146W   |
| YGR153W   | YKL087C   | YHR110W   | YMR267W   | YBL001C   | YDR357C   | YIL152W   | YOR354C   |
| YDR377W   | YOR157C   | YDR275W   | YCR039C   | YJL225C   | YNL134C   | YGL068W   | YPL096C-A |
| YKL141W   | YJR085C   | YER053C   | YKL142W   | YIL045W   | YGR032W   | YER080W   | YLR134W   |
| YNL103W   | YMR002W   | YGR147C   | YDR148C   | YJL084C   | YOR020C   | YIR038C   | YDR288W   |
| YJL037W   | YJL048C   | YOR321W   | YGL247W   | YOR221C   | YCR031C   | YGR183C   | YDR031W   |
| YIR003W   | YNL092W   | YDR330W   | YJL185C   | YPR165W   | YOR185C   | YMR122W-A | YJL001W   |
| YMR201C   | YDR188W   | YIL052C   | YIL065C   | YFR051C   | YKL072W   | YDL013W   | YGR042W   |
| YGR085C   | YBR280C   | YMR217W   | YCR100C   | YGR268C   | YOR097C   | YDR363W-A | YBL015W   |
| YNR021W   | YOR210W   | YJR049C   | YDL171C   | YMR256C   | YJL088W   | YDR085C   | YGR009C   |
| YGL058W   | YKL210W   | YHR170W   | YGL011C   | YOR206W   | YDR385W   | YBL113C   | YJR064W   |
| YFR001W   | YOL111C   | YEL009C   | YPL131W   | YOL052C-A | YGR102C   | YBR089C-A | YIL111W   |
| YGR256W   | YPL117C   | YIL055C   | YMR011W   | YLR300W   | YOR023C   | YLR193C   | YGR170W   |
| YFL059W   | YEL052W   | YNL004W   | YIL051C   | YLR161W   | YOR036W   | YCR060W   | YFR015C   |
| YLR333C   | YHR195W   | YLR179C   | YDR328C   | YDR530C   | YKL069W   | YHR097C   | YGR079W   |
| YFL037W   | YOR158W   | YDR028C   | YDR277C   | YBL091C   | YLR250W   | YBR191W   | YOR202W   |
| YNL047C   | YDR032C   | YHR005C   | YOR176W   | YBL038W   | YCL052C   | YLR054C   | YOR099W   |
| YGL055W   | YFR050C   | YNL305C   | YHR098C   | YJR086W   | YER154W   | YGR043C   | YDL181W   |
| YNL215W   | YDR278C   | YGL206C   | YPR149W   | YHR132C   | YAL014C   | YLR069C   | YMR170C   |
| YOL153C   | YDR092W   | YGL221C   | YBR267W   | YIL083C   | YCL033C   | YNL037C   | YDL149W   |
| YGL030W   | YOR042W   | YOR316C   | YIL165C   | YBL056W   | YBR214W   | YJR050W   | YDR427W   |
| YIL147C   | YNL055C   | YMR016C   | YDR283C   | YLR312C   | YFR032C-A | YER112W   | YLR369W   |
| YDR043C   | YDR367W   | YPL010W   | YOR040W   | YKL155C   | YBR111C   | YIL062C   | YIL007C   |
| YGL056C   | YAL003W   | YKL164C   | YMR083W   | YDR196C   | YAL041W   | YMR062C   | YJR009C   |
| YNR037C   | YNL323W   | YKR076W   | YIL097W   | YDL067C   | YOR318C   | YFL038C   | YNL104C   |
| YNL162W-A | YML110C   | YGR122C-A | YIL155C   | YDR172W   | YGR028W   | YKL004W   | YBR046C   |
| YDR382W   | YBR079C   | YDR006C   | YLL010C   | YKR008W   | YJL014W   | YLR421C   | YOR084W   |
| YLR395C   | YPL059W   | YPL249C-A | YBR263W   | YBR011C   | YGR118W   | YIL014C-A | YER009W   |
| YER119C   | YIL133C   | YDR155C   | YML121W   | YDL125C   | YKL018C-A | YLR290C   | YOR088W   |
| YLR330W   | YBR242W   | YER146W   | YER123W   | YER007W   | YOR119C   | YBR230C   | YMR244C-A |
| YLR027C   | YPR120C   | YFR010W   | YGR234W   | YKL084W   | YOR103C   | YAL003W   | YAL043C   |
| YBR110W   | YHR005C-A | YMR208W   | YMR072W   | YMR243C   | YLR346C   | YNL255C   | YER067W   |
| YJR125C   | YLR110C   | YDL247W-A | YJR065C   | YIL149C   | YMR145C   | YMR255W   | YDL150W   |

|         |           |           |           |
|---------|-----------|-----------|-----------|
| YCR096C | YKL192C   | YHR103W   | YIR004W   |
| YBR072W | YPR056W   | YGL121C   | YDL081C   |
| YLR185W | YLL066C   | YGR240C   | YKL061W   |
| YMR280C | YLR028C   | YNL223W   | YLR340W   |
| YBL086C | YLR150W   | YOR062C   | YKR057W   |
| YDR127W | YPL129W   | YKR017C   | YPL220W   |
| YMR156C | YNL221C   | YER177W   | YML030W   |
| YMR110C | YLR362W   | YFR006W   | YOR198C   |
| YML128C | YLR194C   | YDL002C   | YOR045W   |
| YKL013C | YOL159C-A | YBR145W   | YJL027C   |
| YIL087C | YDR513W   | YGL231C   | YBL107W-A |
| YDR397C | YMR107W   | YOR247W   | YJL142C   |
| YFL048C | YDR129C   | YCR021C   | YEL060C   |
| YKR043C | YLR201C   | YLR219W   | YOR261C   |
| YFL041W | YAL038W   | YDL097C   | YCR094W   |
| YER030W | YBR255C-A | YPL212C   | YPL134C   |
| YNL322C | YGL207W   | YER136W   | YMR120C   |
| YMR175W | YAL061W   | YGL047W   | YBR059C   |
| YJR104C | YOR228C   | YIL024C   | YBR016W   |
| YML091C | YGL200C   | YER159C   | YFL043C   |
| YMR071C | YLR152C   | YPL259C   | YGR206W   |
| YDL184C | YCL057C-A | YKL020C   | YML009C-A |
| YOR031W | YOR073W   | YLR390W-A | YGR086C   |
| YPR103W | YOR396W   | YOL058W   | YGR250C   |
| YDL046W | YKR066C   | YBL048W   | YDL193W   |
| YKL148C | YEL059C-A | YGL228W   | YLR270W   |
| YHR193C | YCR028C-A | YGR024C   | YKR018C   |
| YPR198W | YHR135C   | YLR043C   | YBR026C   |
| YHR081W | YPR134W   | YCL067C   | YGR080W   |
| YPR061C | YLR135W   | YBR071W   | YNL036W   |
| YDR545W | YKL065C   | YPL206C   | YKL186C   |
| YDR153C | YBR149W   | YCL031C   | YPL234C   |
| YGR253C | YPL127C   | YGL123W   | YAL032C   |
| YHR141C | YDR482C   | YKR006C   | YKL007W   |
| YCR082W | YGL035C   | YIL005W   | YER063W   |
| YOR167C | YMR026C   | YMR226C   | YBR159W   |
| YDR248C | YOR328W   | YJL130C   | YJL052W   |
| YGL117W | YGR215W   | YDR055W   | YKL059C   |
| YDR068W | YER054C   | YER131W   | YOR260W   |
| YHR021C | YJL153C   | YEL065W   | YOR039W   |
| YPR102C | YIL177C   | YOR315W   | YPL257W-A |
| YBL027W | YEL054C   | YHR203C   | YBL050W   |
| YKL150W | YPL037C   | YMR040W   | YNR022C   |
| YML133C | YBL058W   | YOL103W   |           |
| YLR345W | YMR038C   | YLR344W   |           |
| YEL034W | YBL055C   | YKL002W   |           |
| YDL124W | YDL061C   | YLR447C   |           |
| YNL244C | YER006W   | YOR095C   |           |
| YCR093W | YBR125C   | YGL130W   |           |
| YOL038W | YDR429C   | YBR062C   |           |
| YDR511W | YDR483W   | YCL043C   |           |
| YBL030C | YOL071W   | YDL086W   |           |
| YBR269C | YBR118W   | YPL232W   |           |
| YOR270C | YJL151C   | YCR083W   |           |
| YKL217W | YLR311C   | YNL156C   |           |
| YDR040C | YGL153W   | YOR374W   |           |
| YOR153W | YGL156W   | YDR177W   |           |
| YLR142W | YGR270W   | YFL018C   |           |
| YDR258C | YOR264W   | YBR165W   |           |
| YBR035C | YMR176W   | YAL049C   |           |
| YDR232W | YNL030W   | YDL136W   |           |
| YJL102W | YJL166W   | YGR121C   |           |
| YNL242W | YMR074C   | YOR035C   |           |
| YMR180C | YOR251C   | YGL186C   |           |
| YMR121C | YER094C   | YOR360C   |           |
| YLR208W | YLR410W   | YDL070W   |           |
| YNL097C | YOR339C   | YOR333C   |           |
| YGR248W | YMR099C   | YGL002W   |           |
| YHR033W | YMR304W   | YNR015W   |           |
| YOR072W | YGR189C   | YDL134C   |           |
| YDR264C | YER165W   | YGL087C   |           |

| Q Protease                                     | Probability |
|------------------------------------------------|-------------|
| Ty element transposition                       | 2.21E-28    |
| transposition                                  | 5.54E-27    |
| transposition, DNA-mediated                    | 5.54E-27    |
| DNA recombination                              | 3.15E-15    |
| DNA metabolism                                 | 4.82E-06    |
| protein targeting to mitochondrion             | 0.00014     |
| homeostasis                                    | 0.00017     |
| cellular localization                          | 0.00027     |
| ion homeostasis                                | 0.00039     |
| establishment of cellular localization         | 0.00041     |
| protein folding                                | 0.00042     |
| intracellular transport                        | 0.00044     |
| cell homeostasis                               | 0.00056     |
| nitrogen compound biosynthesis                 | 0.0012      |
| amino acid and derivative metabolism           | 0.0012      |
| amine biosynthesis                             | 0.0012      |
| establishment of protein localization          | 0.00143     |
| cofactor metabolism                            | 0.00164     |
| cell ion homeostasis                           | 0.00168     |
| cation homeostasis                             | 0.00194     |
| regulation of pH                               | 0.00198     |
| protein localization                           | 0.00207     |
| protein targeting                              | 0.00236     |
| amino acid biosynthesis                        | 0.00245     |
| amine metabolism                               | 0.00249     |
| monovalent inorganic cation homeostasis        | 0.00271     |
| intracellular protein transport                | 0.00286     |
| nitrogen compound metabolism                   | 0.00306     |
| amino acid metabolism                          | 0.00306     |
| protein transport                              | 0.00329     |
| asparagine metabolism                          | 0.00336     |
| regulation of translation                      | 0.00441     |
| organic acid metabolism                        | 0.00463     |
| carboxylic acid metabolism                     | 0.00463     |
| regulation of protein biosynthesis             | 0.00553     |
| aspartate family amino acid catabolism         | 0.00555     |
| generation of precursor metabolites and energy | 0.00583     |
| aspartate family amino acid metabolism         | 0.00617     |
| coenzyme metabolism                            | 0.00677     |
| cellular response to nitrogen levels           | 0.00856     |
| asparagine catabolism                          | 0.00856     |
| cellular response to nitrogen starvation       | 0.00856     |
| iron ion homeostasis                           | 0.00917     |
| threonine metabolism                           | 0.00935     |
| glutamine family amino acid metabolism         | 0.00963     |
| biogenic amine biosynthesis                    | 0.0116      |
| glutamine family amino acid biosynthesis       | 0.01184     |
| malate metabolism                              | 0.01235     |
| water-soluble vitamin metabolism               | 0.01408     |
| vitamin metabolism                             | 0.01408     |
| ion transport                                  | 0.01452     |
| amino acid derivative metabolism               | 0.01487     |
| vacuolar acidification                         | 0.0153      |
| hydrogen ion homeostasis                       | 0.0153      |
| pH reduction                                   | 0.0153      |
| proton transport                               | 0.0153      |
| serine family amino acid metabolism            | 0.0153      |
| cellular pH reduction                          | 0.0153      |

|                                                                            |         |
|----------------------------------------------------------------------------|---------|
| regulation of cellular pH                                                  | 0.0153  |
| hydrogen transport                                                         | 0.0153  |
| pyridine nucleotide metabolism                                             | 0.01616 |
| ribosomal small subunit assembly and maintenance                           | 0.0182  |
| cation transport                                                           | 0.01821 |
| energy derivation by oxidation of organic compounds                        | 0.01923 |
| biogenic amine metabolism                                                  | 0.01931 |
| response to inorganic substance                                            | 0.01979 |
| amino acid derivative biosynthesis                                         | 0.01979 |
| regulation of protein metabolism                                           | 0.02023 |
| tryptophan metabolism                                                      | 0.0222  |
| indole and derivative metabolism                                           | 0.0222  |
| indolalkylamine biosynthesis                                               | 0.0222  |
| indole derivative metabolism                                               | 0.0222  |
| indole derivative biosynthesis                                             | 0.0222  |
| indolalkylamine metabolism                                                 | 0.0222  |
| aromatic amino acid family biosynthesis, anthranilate pathway              | 0.0222  |
| tryptophan biosynthesis                                                    | 0.0222  |
| SRP-dependent cotranslational protein targeting to membrane, translocation | 0.0222  |
| oxidoreduction coenzyme metabolism                                         | 0.02238 |
| protein import                                                             | 0.02268 |
| regulation of biosynthesis                                                 | 0.02341 |
| regulation of cellular biosynthesis                                        | 0.02341 |
| metal ion homeostasis                                                      | 0.02475 |
| protein import into mitochondrial matrix                                   | 0.02515 |
| main pathways of carbohydrate metabolism                                   | 0.02537 |
| cofactor biosynthesis                                                      | 0.02537 |
| homoserine metabolism                                                      | 0.02582 |
| signal peptide processing                                                  | 0.02582 |
| glyoxylate cycle                                                           | 0.02611 |
| ribosomal small subunit export from nucleus                                | 0.02611 |
| glyoxylate metabolism                                                      | 0.02611 |
| budding cell bud growth                                                    | 0.02739 |
| alcohol biosynthesis                                                       | 0.02739 |
| non-developmental growth                                                   | 0.02739 |
| coenzyme biosynthesis                                                      | 0.02765 |
| nucleotide metabolism                                                      | 0.02796 |
| cell budding                                                               | 0.03545 |
| asexual reproduction                                                       | 0.03545 |
| peptide metabolism                                                         | 0.03906 |
| protein secretion                                                          | 0.03906 |
| heterocycle metabolism                                                     | 0.04008 |
| spermidine biosynthesis                                                    | 0.04027 |
| nicotinate nucleotide salvage                                              | 0.04027 |
| pyridine nucleotide salvage                                                | 0.04027 |
| GDP-mannose biosynthesis                                                   | 0.04027 |
| S-adenosylmethionine transport                                             | 0.04027 |
| glutathione biosynthesis                                                   | 0.04027 |
| nucleotide salvage                                                         | 0.04027 |
| nucleotide-sugar biosynthesis                                              | 0.04027 |
| spermidine metabolism                                                      | 0.04027 |
| mannose biosynthesis                                                       | 0.04027 |
| GDP-mannose metabolism                                                     | 0.04027 |
| nicotinate nucleotide metabolism                                           | 0.04027 |
| lysyl-tRNA aminoacylation                                                  | 0.04027 |
| SRP-dependent cotranslational protein targeting to membrane                | 0.04133 |
| peroxisome organization and biogenesis                                     | 0.04146 |
| growth                                                                     | 0.04212 |
| serine family amino acid biosynthesis                                      | 0.04306 |

|                                                       |         |
|-------------------------------------------------------|---------|
| response to starvation                                | 0.0431  |
| branched chain family amino acid metabolism           | 0.0431  |
| cellular response to starvation                       | 0.0431  |
| cellular response to extracellular stimulus           | 0.0431  |
| cellular response to stimulus                         | 0.0431  |
| cellular response to nutrient levels                  | 0.0431  |
| protein modification                                  | 0.04387 |
| ubiquitin cycle                                       | 0.04543 |
| regulation of translational initiation                | 0.04553 |
| response to copper ion                                | 0.04553 |
| protein import into mitochondrial intermembrane space | 0.04553 |
| proteasome assembly                                   | 0.04553 |
| sulfur amino acid transport                           | 0.04553 |
| response to extracellular stimulus                    | 0.04709 |
| response to nutrient levels                           | 0.04709 |
| response to external stimulus                         | 0.04709 |
| di-, tri-valent inorganic cation homeostasis          | 0.05078 |
| nucleobase biosynthesis                               | 0.0511  |
| ribosomal large subunit biogenesis                    | 0.0511  |
| monovalent inorganic cation transport                 | 0.05111 |
| protein processing                                    | 0.05385 |
| response to metal ion                                 | 0.05462 |
| siderophore transport                                 | 0.05552 |
| protein import into mitochondrial inner membrane      | 0.05552 |
| glycerol metabolism                                   | 0.05552 |
| polyol metabolism                                     | 0.05552 |
| ribonucleotide biosynthesis                           | 0.05562 |
| glutamate biosynthesis                                | 0.05678 |
| alcohol metabolism                                    | 0.05945 |
| phosphorylation                                       | 0.06599 |
| histone acetylation                                   | 0.0671  |
| thiamin and derivative biosynthesis                   | 0.06784 |
| negative regulation of translation                    | 0.07031 |
| manganese ion transport                               | 0.07031 |
| cytokinesis, completion of separation                 | 0.07031 |
| negative regulation of cellular biosynthesis          | 0.07031 |
| microautophagy                                        | 0.07031 |
| L-amino acid transport                                | 0.07031 |
| negative regulation of protein biosynthesis           | 0.07031 |
| poly(A)+ mRNA export from nucleus                     | 0.07031 |
| mitochondrial protein processing                      | 0.07031 |
| negative regulation of biosynthesis                   | 0.07031 |
| dicarboxylic acid metabolism                          | 0.07031 |
| invasive growth (sensu Saccharomyces)                 | 0.07187 |
| ribonucleotide metabolism                             | 0.07268 |
| NADPH regeneration                                    | 0.07273 |
| cotranslational protein targeting to membrane         | 0.07468 |
| protein catabolism                                    | 0.0747  |
| iron-sulfur cluster assembly                          | 0.07517 |
| metallo-sulfur cluster assembly                       | 0.07517 |
| budding cell isotropic bud growth                     | 0.07517 |
| cell communication                                    | 0.07608 |
| vacuolar transport                                    | 0.07674 |
| hexose biosynthesis                                   | 0.0788  |
| monosaccharide biosynthesis                           | 0.0788  |
| amino acid catabolism                                 | 0.0788  |
| vesicle fusion                                        | 0.0788  |
| nucleotide biosynthesis                               | 0.0798  |
| protein targeting to ER                               | 0.0811  |

|                                                  |         |
|--------------------------------------------------|---------|
| nucleobase metabolism                            | 0.0811  |
| proline biosynthesis                             | 0.08188 |
| mannose metabolism                               | 0.08188 |
| sodium ion homeostasis                           | 0.08188 |
| positive regulation of cellular biosynthesis     | 0.08188 |
| vesicle coating                                  | 0.08188 |
| glycerol catabolism                              | 0.08188 |
| positive regulation of protein biosynthesis      | 0.08188 |
| homoserine biosynthesis                          | 0.08188 |
| positive regulation of translation               | 0.08188 |
| positive regulation of protein metabolism        | 0.08188 |
| polyol biosynthesis                              | 0.08188 |
| polyol catabolism                                | 0.08188 |
| threonine catabolism                             | 0.08188 |
| glycerol biosynthesis                            | 0.08188 |
| positive regulation of biosynthesis              | 0.08188 |
| transition metal ion homeostasis                 | 0.0819  |
| purine ribonucleotide biosynthesis               | 0.08216 |
| tricarboxylic acid cycle intermediate metabolism | 0.08275 |
| ribonucleoside triphosphate biosynthesis         | 0.08852 |
| ribonucleoside triphosphate metabolism           | 0.08852 |
| acetyl-CoA catabolism                            | 0.09088 |
| negative regulation of protein metabolism        | 0.09088 |
| protein targeting to peroxisome                  | 0.09088 |
| pyrimidine base biosynthesis                     | 0.09088 |
| tricarboxylic acid cycle                         | 0.09088 |
| nicotinamide metabolism                          | 0.09305 |
| cellular protein catabolism                      | 0.09447 |
| phosphorus metabolism                            | 0.09468 |
| phosphate metabolism                             | 0.09468 |
| ubiquitin-dependent protein catabolism           | 0.09563 |
| modification-dependent protein catabolism        | 0.09563 |
| modification-dependent macromolecule catabolism  | 0.09563 |
| regulation of cell redox homeostasis             | 0.09783 |
| cell redox homeostasis                           | 0.09783 |
| thiamin and derivative metabolism                | 0.09934 |
| protein refolding                                | 0.09989 |
| phosphatidylcholine biosynthesis                 | 0.09989 |
| NAD biosynthesis                                 | 0.09989 |
| calcium-mediated signaling                       | 0.09989 |
| 'de novo' protein folding                        | 0.09989 |
| Not yet annotated                                |         |

|             |         |           |           |
|-------------|---------|-----------|-----------|
| NQ Protease | YPR062W | YJL012C-A | YMR305C   |
| Gene list   | YLR109W | YGR170W   | YOR144C   |
| YPR185W     | YML121W | YBL045C   | YHL008C   |
| YMR058W     | YLR161W | YOR192C-A | YKL013C   |
| YPR073C     | YIR029W | YKR084C   | YIL065C   |
| YPR081C     | YGR110W | YJL062W-A | YKL100C   |
| YFL065C     | YJL161W | YBR104W   | YDR006C   |
| YPR196W     | YFL066C | YNL192W   | YLR346C   |
| YML126C     | YGR073C | YOR251C   | YHR049W   |
| YOR019W     | YDR085C | YLR038C   | YLR367W   |
| YBR021W     | YIL135C | YIR041W   | YGR191W   |
| YPR023C     | YDR405W | YKL097C   | YJL134W   |
| YOR264W     | YGR024C | YOR347C   | YHR025W   |
| YPR026W     | YJL111W | YLR077W   | YGR294W   |
| YNL078W     | YKL049C | YNL332W   | YOR227W   |
| YGR187C     | YIL157C | YHR049C-A | YEL071W   |
| YBR295W     | YKL199C | YCL020W   | YDR453C   |
| YLR392C     | YPR202W | YJR072C   | YNL097C   |
| YGL012W     | Q0010   | YCL041C   | YOL081W   |
| YNL307C     | YPR198W | YBR280C   | YIL147C   |
| YPR013C     | YFL067W | YPL195W   | YGL231C   |
| YNL333W     | YDR373W | YBR077C   | YOR164C   |
| YPR128C     | YER096W | YNL336W   | YGL245W   |
| YPR172W     | YDL082W | YDL025C   | YNR028W   |
| YDL048C     | YOR371C | YPR100W   | YMR027W   |
| YAL036C     | YJL122W | YPL049C   | YPR127W   |
| YOR321W     | YPL207W | YDR250C   | YJL048C   |
| YGL106W     | YOR340C | YBL036C   | YFL044C   |
| YBR079C     | YMR022W | YML010W   | YGL196W   |
| YGL206C     | YMR221C | YIL087C   | YNL294C   |
| YFL002W-B   | YJR099W | YJR015W   | YBR296C   |
| YLR069C     | YBL026W | YML075C   | YPR158W-A |
| YPR161C     | YOR131C | YKL041W   | YNL338W   |
| YDR284C     | YOR329C | YLL056C   | YBR122C   |
| YPL265W     | YOR134W | YLR387C   | YDR204W   |
| YER047C     | YBR120C | YHR082C   | YDR083W   |
| YGR252W     | YPL237W | YPR063C   | YLR359W   |
| YGL019W     | YBR188C | YLL010C   | YER166W   |
| YOR258W     | YLR298C | YPL269W   | YHR098C   |
| YPR159W     | YJL128C | YGR121C   | YDR152W   |
| YMR153W     | YBR158W | YKR089C   | YBR025C   |
| YOL017W     | YOL044W | YER144C   | YDR270W   |
| YKL072W     | YOR224C | YOR171C   | YHR081W   |
| YPL179W     | YLL067C | YJR086W   | YGL248W   |
| YMR170C     | YMR095C | YDR022C   | YJR156C   |
| YGR143W     | YFL068W | YKL080W   | YLR169W   |
| YNL215W     | YDL173W | YGL159W   | YJR161C   |
| YLR201C     | YLR156W | YLR290C   | YKL206C   |
| YKL023W     | YLR271W | YDR378C   | YDR258C   |
| YBL007C     | YJR100C | YCR091W   | YEL045C   |
| YNL084C     | YBR199W | YLR369W   | YNR017W   |
| YDR271C     | YDR479C | YOR246C   | YGR198W   |
| YLR368W     | YPR056W | YBR274W   | YBR236C   |
| YML120C     | YPR148C | YNL194C   | YGL173C   |
| YDR494W     | YPL169C | YDR333C   |           |
| YLR462W     | YBR222C | YDL120W   |           |
| YGR138C     | YLR465C | YGR153W   |           |

| GO_term                                                                         | Probability |
|---------------------------------------------------------------------------------|-------------|
| regulation of signal transduction                                               | 0.00096     |
| 1,6-beta-glucan biosynthesis                                                    | 0.00375     |
| transcription from RNA polymerase I promoter                                    | 0.0043      |
| 1,6-beta-glucan metabolism                                                      | 0.00577     |
| cortical cytoskeleton organization and biogenesis                               | 0.00577     |
| cortical actin cytoskeleton organization and biogenesis                         | 0.00577     |
| vitamin B6 metabolism                                                           | 0.01415     |
| beta-glucan biosynthesis                                                        | 0.01415     |
| pyridoxine metabolism                                                           | 0.01415     |
| phosphorus metabolism                                                           | 0.01418     |
| phosphate metabolism                                                            | 0.01418     |
| signal transduction                                                             | 0.01647     |
| beta-glucan metabolism                                                          | 0.01766     |
| protein amino acid phosphorylation                                              | 0.01802     |
| phosphorylation                                                                 | 0.01827     |
| ergosterol metabolism                                                           | 0.01906     |
| ergosterol biosynthesis                                                         | 0.01906     |
| endocytosis                                                                     | 0.03028     |
| cell communication                                                              | 0.03131     |
| sterol biosynthesis                                                             | 0.03302     |
| biopolymer biosynthesis                                                         | 0.03858     |
| polysaccharide biosynthesis                                                     | 0.03858     |
| actin cortical patch assembly                                                   | 0.03976     |
| actin filament organization                                                     | 0.04907     |
| peroxisome organization and biogenesis                                          | 0.05443     |
| steroid biosynthesis                                                            | 0.05443     |
| thiamin biosynthesis                                                            | 0.05616     |
| response to metal ion                                                           | 0.05616     |
| sterol metabolism                                                               | 0.05792     |
| transcription from RNA polymerase III promoter                                  | 0.05792     |
| cellular lipid metabolism                                                       | 0.06017     |
| cell wall polysaccharide biosynthesis (sensu Fungi)                             | 0.06207     |
| thiamin and derivative biosynthesis                                             | 0.06207     |
| thiamin metabolism                                                              | 0.06207     |
| protein deubiquitination                                                        | 0.06818     |
| cell surface receptor linked signal transduction                                | 0.069       |
| thiamin and derivative metabolism                                               | 0.07448     |
| glucan biosynthesis                                                             | 0.07448     |
| lipid metabolism                                                                | 0.07952     |
| response to inorganic substance                                                 | 0.08096     |
| steroid metabolism                                                              | 0.08941     |
| translational initiation                                                        | 0.09376     |
| signal transduction during conjugation with cellular fusion                     | 0.09441     |
| regulation of conjugation with cellular fusion                                  | 0.09441     |
| regulation of conjugation                                                       | 0.09441     |
| pheromone-dependent signal transduction during conjugation with cellular fusion | 0.09441     |
| Not yet annotated                                                               |             |



|            |         |         |         |           |           |
|------------|---------|---------|---------|-----------|-----------|
| Stationary | YOR171C | YPL013C | YER004W | YAL053W   | YOR256C   |
| phase      | YJL021C | YGR256W | YEL046C | YPR086W   | YLR194C   |
| protease   | YDL083C | YJL048C | YJR121W | YJL091C   | YCR024C-A |
| gene list  | YER006W | YOL129W | YLR069C | YJL217W   | YPL223C   |
| YAL036C    | YKR097W | YJR009C | YBR005W | YML070W   | YER186C   |
| YPL231W    | YGL053W | YKL103C | YGL030W | YGL126W   | YJR044C   |
| YKL141W    | YKL186C | YCR031C | YFL018C | YDR025W   | YGR135W   |
| YIL069C    | YGR254W | YML128C | YNL105W | YMR297W   | YBL003C   |
| YLR163C    | YBL099W | YDR385W | YNR017W | YPL154C   | YOL126C   |
| YPL004C    | YLR270W | YDL173W | YDR134C | YHR139C   | YJL138C   |
| YKL164C    | YDR155C | YDR533C | YJR093C | YOR142W   | YOR027W   |
| YOR317W    | YDR098C | YGR146C | YLR158C | YPL247C   | YER024W   |
| YJL121C    | YKL050C | YDL130W | YDR381W | YJR016C   | YPL178W   |
| YBL041W    | YOL039W | YKL049C | YCL011C | YEL017C-A | YGR033C   |
| YOR010C    | YCR047C | YBR036C | YDR298C | YJR019C   | YMR072W   |
| YLR174W    | YNR047W | YNL281W | YGR106C | YDR343C   | YDR059C   |
| YKL163W    | YMR008C | YGR234W | YPL203W | YJL066C   | YMR295C   |
| YLL010C    | YOR133W | YHR087W | YJL171C | YMR031C   | YKL037W   |
| YBR048W    | YOR220W | YBR056W | YKR072C | YOR136W   | YPL143W   |
| YGR180C    | YPR088C | YBR068C | YML026C | YGL255W   | YIL035C   |
| YDR232W    | YDR178W | YPL057C | YDR077W | YKL217W   | YDR111C   |
| YDL169C    | YBL049W | YKL107W | YKL034W | YOL070C   | YCL054W   |
| YLR110C    | YNL195C | YOR248W | YOL030W | YOR052C   | YOR173W   |
| YFL014W    | YJL158C | YDL046W | YNL135C | YER011W   | YGL173C   |
| YLL041C    | YER023W | YKR100C | YFR053C | YJR014W   | YCR075C   |
| YLR109W    | YLR151C | YBL045C | YOL120C | YDL029W   | YNL104C   |
| YOR298C-A  | YFL039C | YPR080W | YJR130C | YMR116C   | YLR259C   |
| YLR066W    | YKL056C | YMR280C | YAL034C | YIL154C   | YGR279C   |
| YMR143W    | YDL218W | YKL142W | YAL039C | YER117W   | YDR064W   |
| YGR282C    | YCL025C | YMR154C | YNL241C | YMR120C   | YIL155C   |
| YDR427W    | YER072W | YJR095W | YKL058W | YOR230W   | YPR151C   |
| YNL294C    | YML028W | YHR104W | YLR380W | YIL077C   | YDR174W   |
| YDR524C    | YJR123W | YMR090W | YDR432W | YGL191W   | YMR108W   |
| YEL009C    | YIL023C | YLR173W | YFL036W | YLL039C   | YDL066W   |
| YPR149W    | YIL047C | YBL064C | YNL129W | YGL181W   | YLR410W   |
| YER134C    | YGR192C | YGL076C | YBR039W | YER064C   | YNL014W   |
| YNL016W    | YCL009C | YLR160C | YDR345C | YOR383C   | YCL057W   |
| YMR272C    | YPL237W | YLL045C | YDL017W | YIL018W   | YJL034W   |
| YGL055W    | YDL223C | YHR193C | YER159C | YJL026W   | YGL159W   |
| YDL055C    | YBL015W | YOR251C | YDR226W | YIL071C   | YKL026C   |
| YNR055C    | YLR340W | YLR075W | YKR087C | YOR192C-A | YFL030W   |
| YPL078C    | YNL305C | YOL073C | YPL135W | YMR022W   | YER044C   |
| YOL071W    | YPL048W | YLR052W | YER088C | YDR197W   | YJR104C   |
| YDR329C    | YFL045C | YJL042W | YLR342W | YNL333W   | YBL030C   |
| YDL004W    | YHR146W | YNL098C | YLR189C | YNL240C   | YDR503C   |
| YER065C    | YEL034W | YNL200C | YEL027W | YBR118W   | YER035W   |
| YOL052C-A  | YBR157C | YBR241C | YPL019C | YPL028W   | YJR099W   |
| YIL034C    | YNL079C | YNL239W | YDR238C | YNL192W   | YDR127W   |
| YDL096C    | YKL100C | YPL092W | Q0130   | YER128W   | YBR263W   |
| YNL190W    | YDL078C | YMR104C | YFR051C | YHR033W   | YDR354W   |
| YAL035W    | YGL206C | YBL101C | YDR055W | YFL041W   | YJR008W   |
| YDL084W    | YOR163W | YMR118C | YCL043C | YGR178C   | YMR122W-A |
| YNL284C-A  | YLR029C | YDR204W | YNL071W | YBL075C   | YER165W   |
| YHR132C    | YCL017C | YKL207W | YJL079C | YOR276W   | YKL083W   |
| YCL040W    | YKL081W | YHL021C | YHR049W | YBR139W   | YBR222C   |
| YOL012C    | YLR134W | YLR249W | YDR003W | YKR080W   | YHR037W   |
| YIL143C    | YER074W | YKR076W | YEL045C | YPL218W   | YLR054C   |

|           |         |           |           |           |           |
|-----------|---------|-----------|-----------|-----------|-----------|
| YKL148C   | YFR049W | YER084W   | YMR251W-A | YPR002W   | YOR338W   |
| YGL253W   | YDR479C | YNL117W   | YFL037W   | YGL237C   | YHR030C   |
| YCR069W   | YOR132W | YDR210C-D | YGR060W   | YER003C   | YCR051W   |
| YJL153C   | YEL024W | YHR072W   | YCR071C   | YDR001C   | YML034C-A |
| YLR229C   | YML048W | YKR018C   | YOR371C   | YLR027C   | YAL042W   |
| YGR037C   | YML091C | YOR003W   | YKR035W-A | YDL007W   | YHR057C   |
| YDR382W   | YAL030W | YML120C   | YDL123W   | YIL065C   | YGR027C   |
| YOR394W   | YNL323W | YOL059W   | YGL037C   | YOR101W   | YGL146C   |
| YML012W   | YIL117C | YFR024C-A | YKL109W   | YLL018C   | YGL200C   |
| YBR217W   | YLR286C | YOL086C   | YGL147C   | YCR100C   | YKR001C   |
| YBR025C   | YOL081W | YLL043W   | YER057C   | YGR255C   | YKR025W   |
| YOR185C   | YGL040C | YEL044W   | YJR105W   | YNL307C   | YIL176C   |
| YGL056C   | YEL002C | YKR048C   | YAL063C   | YMR050C   | YFR003C   |
| YDR319C   | YLR257W | YBR053C   | YOR174W   | YBR011C   | YLR293C   |
| YGL062W   | YGR214W | YML100W   | YDR510W   | YNL232W   | YHR102W   |
| YKL114C   | YMR121C | YNL194C   | YGL058W   | YMR096W   | YNL051W   |
| YGR110W   | YDR494W | YEL060C   | YLL028W   | YHR038W   | YNL121C   |
| YHR026W   | YDR148C | YHR071W   | YNL157W   | YER017C   | YML045W   |
| YDR250C   | YNL142W | YER154W   | YGR161W-A | YBR067C   | YIL007C   |
| YHR175W   | YNL189W | YOR065W   | YJR077C   | YIL087C   | YPR180W   |
| YDL159W-A | YKL218C | YGR086C   | YDR156W   | YLR410W-A | YDL097C   |
| YML126C   | YFR024C | YGL044C   | YOL083W   | YIL125W   | YGR161W-B |
| YDR128W   | YJR017C | YNL338W   | YOR246C   | YNR001C   | YLR367W   |
| YNL096C   | YLR312C | YGL256W   | YOR357C   | YGR164W   | YAL060W   |
| YGR240C   | YDR092W | YBR162C   | YBR298C   | YNL056W   | YBR262C   |
| YKR084C   | YOR141C | YDR019C   | YFL058W   | YKL069W   | YOR082C   |
| YLR093C   | YBR169C | YLR300W   | YKL124W   | YOR111W   | YPR041W   |
| YHR122W   | YJL210W | YEL011W   | YOR134W   | YBR286W   | YIL043C   |
| YDR032C   | YDL086W | YLR017W   | YPR156C   | YDR054C   | YER136W   |
| YBR090C   | YOR117W | YMR103C   | YER124C   | YDL203C   | YDR225W   |
| YER103W   | YMR071C | YDL081C   | YPR103W   | YIL161W   | YML024W   |
| YLR432W   | YBR046C | YKR016W   | YPR075C   | YEL038W   | YER152C   |
| YLR048W   | YJL159W | YAL016W   | YLR464W   | YIL051C   | YNL037C   |
| YHR107C   | YDR214W | YMR204C   | YLR440C   | YFL038C   | YGR147C   |
| YOR088W   | YBR150C | YPL202C   | YOR090C   | YOR164C   | YLR406C   |
| YKR046C   | YML092C | YHL025W   | YKL150W   | YIR003W   | YPR069C   |
| YPL106C   | YLR157C | YOL008W   | YGR105W   | YOR155C   | YPR102C   |
| YMR115W   | YPR100W | YOR332W   | YLR439W   | YEL052W   | YNL221C   |
| YLR155C   | YJL045W | YOR247W   | YGR260W   | YLR078C   | YMR045C   |
| YDL049C   | YOR150W | YFL067W   | YLR370C   | YKL192C   | YER160C   |
| YFR047C   | YER036C | YDR313C   | YHR096C   | YMR034C   | YPL266W   |
| YOR223W   | YIL053W | YBL024W   | YEL020W-A | YOR343W-B | YJR015W   |
| YCR004C   | YER130C | YKL177W   | YGR186W   | YDR342C   | YPL084W   |
| YDR525W-A | YML117W | YBR212W   | YNR020C   | YJL161W   | YAL005C   |
| YGL012W   | YFL059W | YOL108C   | YHR143W   | YKR037C   | YFL044C   |
| YKL005C   | YOR145C | YOR264W   | YKL084W   | YPL001W   | YOR369C   |
| YNL336W   | YPR023C | YMR139W   | YOR347C   | YPR148C   | YKL151C   |
| YOR382W   | YDR255C | YHR214W-A | YPR035W   | YAL038W   | YFR004W   |
| YDL215C   | YJR085C | YAL061W   | YNL130C   | YKL059C   | YBR052C   |
| YKL046C   | YLR351C | YNR021W   | YOR385W   | YER172C   | YKR017C   |
| YBR109C   | YGR124W | YDL014W   | YDR158W   | YOR020C   | YDR034C-D |
| YNR002C   | YJL191W | YER007C-A | YDR405W   | YBL007C   | YPL240C   |
| YGR289C   | YPR001W | YKL196C   | YNL312W   | YJL093C   | YOR143C   |
| YER183C   | YNL093W | YAR027W   | YJR065C   | YMR216C   | YDR037W   |
| YMR252C   | YJR006W | YBL102W   | YLR462W   | YOR228C   | YDR331W   |
| YHR051W   | YIR034C | YPL159C   | YMR081C   | YKL156W   | YOR100C   |
| YGR111W   | YLR089C | YIL162W   | YJR025C   | YOR042W   | YJL089W   |

|           |           |           |           |           |           |
|-----------|-----------|-----------|-----------|-----------|-----------|
| YLR267W   | YLR465C   | YNL099C   | YBR059C   | YMR193W   | YOR091W   |
| YDR293C   | YKL060C   | YBL107C   | YBL005W-B | YLR118C   | YOR184W   |
| YDR050C   | YLR414C   | YPR036W   | YDR271C   | YDR447C   | YLR258W   |
| YNR032C-A | YPL036W   | YBR189W   | YPR024W   | YPR043W   | YDR089W   |
| YJR078W   | YFL065C   | YPL213W   | YBR196C   | YNL223W   | YHR074W   |
| YOR227W   | YMR203W   | YDR333C   | YBR234C   | YIR022W   | YGL019W   |
| YJL100W   | YHL011C   | YBR199W   | YDR316W-B | YDL193W   | YHR044C   |
| YLL067C   | YOL053W   | YER138C   | YML133C   | YIL036W   | YIL010W   |
| YOR354C   | YBR287W   | YDL010W   | YDL021W   | YLR178C   | YLR250W   |
| YDL237W   | YAL064W-B | YBR179C   | YHR083W   | YOR381W   | YGR132C   |
| YBR301W   | YPL224C   | YIL170W   | YJR029W   | YBR103W   | YKR068C   |
| YPL015C   | YPR158C-D | YGR121C   | YGR187C   | YHR024C   | YBR197C   |
| YPR181C   | YLR410W-B | YIL105C   | YOR061W   | YMR047C   | YCR012W   |
| YLR090W   | YFR006W   | YKL091C   | YBR230C   | YGR034W   | YMR062C   |
| YLL029W   | YIL157C   | YLR227W-B | Q0010     | YEL076C   | YDR007W   |
| YPR065W   | YLR369W   | YER030W   | YDR129C   | YKL047W   | YLR077W   |
| YLR407W   | YHL027W   | YMR176W   | YGR028W   | YDR289C   | YKL216W   |
| YPL257W-B | YPR063C   | YGL252C   | YBR214W   | YKL160W   | YGR002C   |
| YDR049W   | YNL055C   | YOR374W   | YGR026W   | YBR012W-B | YNL075W   |
| YKL097C   | YHL033C   | YML039W   | YHR214C-B | YOR099W   | YFL066C   |
| YLR135W   | YGL156W   | YGL038C   | YER162C   | YCL020W   | YDL243C   |
| YGL187C   | YLR149C   | YGR218W   | YJR156C   | YCR083W   | YLR179C   |
| YDR434W   | YKL009W   | YHL008C   | YOR142W-B | YBR110W   | YCR018C-A |
| YMR250W   | YGR267C   | YDL248W   | YGR122C-A | YPR056W   | YNL268W   |
| YBR269C   | YLL026W   | YKR014C   | YNL032W   | YLR034C   | YGR038C-B |
| YHR082C   | YPR134W   | YLR019W   | YMR219W   | YLR097C   | YDR410C   |
| YPR154W   | YGR052W   | YCR095C   | YGL257C   | YKL032C   | YBR288C   |
| YJR139C   | YPL201C   | YMR307W   | YNL125C   | YKL085W   | YGL061C   |
| YLR007W   | YIL123W   | YJL111W   | YCR009C   | YLR392C   | YKR006C   |
| YAR009C   | Q0065     | YOL103W-B | YHR002W   | YAL014C   | YGR125W   |
| YDR306C   | YOR192C-B | YNL078W   | YHR199C   | YOL140W   | YFL010C   |
| YDR517W   | YBR017C   | YDR098C-B | YBR013C   | YOR194C   | YMR088C   |
| YGR191W   | YHL020C   | YDR272W   | YJL062W-A | YMR058W   | YPL151C   |
| YPL262W   | YNL003C   | YDR210W-B | YMR212C   | YPR106W   | YBR170C   |
| YDR453C   | YOR333C   | YKL004W   | YDL124W   | YDR035W   | YFL006W   |
| YHR103W   | YPR074C   | YEL026W   | YBR228W   | YLR157C-B | YDR284C   |
| YMR073C   | YPL187W   | YDR261W-B | YNL243W   | YHR005C   | YDR234W   |
| YIL057C   | YKR013W   | YNL031C   | YBL046W   | YIL033C   | YIL177C   |
| YLL024C   | YMR311C   | YPR061C   | YBL101W-B | YMR222C   | YJL008C   |
| YOR095C   | YKL181W   | YPL091W   | YOR202W   | YDR371W   | YDL145C   |
| YIL136W   | YPR128C   | YMR158C-B | YOL016C   | YGL008C   | YKL018C-A |
| YOR224C   | YIL076W   | YHL034C   | YOR343C-A | YOR137C   | YOR260W   |
| YPR052C   | YMR153W   | YAL062W   | YDL150W   | YGR193C   | YPL260W   |
| YDL133C-A | YBL090W   | YNL077W   | YGR276C   | YLR074C   | YJL144W   |
| YGR250C   | YIL045W   | YPR158W-B | YHL007C   | YKR093W   | YDR051C   |
| YOR004W   | YBR140C   | YNL284C-B | YLR225C   | YER167W   | YDR305C   |
| YDR210W-D | YER096W   | YBR079C   | YOR144C   | YCR008W   | YHR117W   |
| YOR353C   | YMR155W   | YBR146W   | YBR290W   | YJR101W   | YEL050C   |
| YER141W   | YPL061W   | YLR161W   | YMR210W   | YML063W   | YDL185W   |
| YLR065C   | YLR159W   | YOR146W   | YDL233W   | YOR072W   | YGL164C   |
| YLR395C   | Q0160     | YGL221C   | YDL245C   | YOR039W   | YOR321W   |
| YLR193C   | YLR441C   | YNL008C   | YPR085C   | YDR079C-A | YJL012C-A |
| YBR165W   | YDL072C   | YOL116W   | YGR295C   | YAL021C   | YMR197C   |
| YOR350C   | YJL001W   | YBR208C   | YOR124C   | YOR176W   | YDR346C   |
| YBR057C   | YDR034C-C | YMR196W   | YDR033W   | YIR006C   | YBR138C   |
| YLR035C-A | YNL332W   | YGR141W   | YDL184C   | YMR221C   | YLR172C   |
| YNL116W   | YDR294C   | YMR004W   | YLL049W   | YHR106W   | YDL231C   |

|           |           |           |           |           |           |
|-----------|-----------|-----------|-----------|-----------|-----------|
| YGR167W   | YCR104W   | YLR080W   | YGL106W   | YEL077C   | YDL047W   |
| YDR365W-B | YDL025C   | YPR110C   | YLR032W   | YBR125C   | YOR285W   |
| YGR009C   | YER153C   | YDR034C-A | YCR019W   | YOL058W   | YML045W-A |
| YML010W   | YOR123C   | YHR018C   | YGR246C   | YCR091W   | YER138W-A |
| YOL110W   | YPR161C   | YNL215W   | YOR273C   | YOR221C   | YOR019W   |
| YFL068W   | YCL019W   | YKL096W-A | YGR294W   | YKR011C   | YHR039C-A |
| YDR210C-C | YEL039C   | YMR214W   | YGR172C   | YML131W   | YBL107W-A |
| YER182W   | YMR146C   | YBR077C   | YIL055C   | YPL098C   | YDR498C   |
| YNL330C   | YML132W   | YER048W-A | YPL149W   | YJR047C   | YPL268W   |
| YMR046W-A | YGL226C-A | YML098W   | YFL048C   | YPR101W   | YLR284C   |
| YNL073W   | YOR147W   | YHR165C   | YJR027W   | YDR530C   | YOR056C   |
| YMR173W   | YKL065C   | YLR112W   | YMR036C   | YJR062C   | YCR021C   |
| YPL186C   | YHR043C   | YGR202C   | YGR144W   | YFL062W   | YGL220W   |
| YHR007C   | YLR304C   | YMR246W   | YER146W   | YLR010C   | YPL016W   |
| YML121W   | YER001W   | YPR002C-A | YML009C-A | YMR305C   | YML075C   |
| YOL121C   | YGR296W   | YOR206W   | YBR267W   | YCL041C   | YHR013C   |
| YLR466W   | YNL115C   | YBR218C   | YOR286W   | YDR328C   | YGR149W   |
| YDR457W   | YKR043C   | YNL054W-B | YDR047W   | YLR330W   | YER031C   |
| YER063W   | YBL005W-A | YBR188C   | YAR050W   | YGL111W   | YLR220W   |
| YGR257C   | YDR248C   | YMR095C   | YJL122W   | YOL112W   | YLL050C   |
| YBR114W   | YGL215W   | YNL009W   | YBL006C   | YJR048W   | YLR371W   |
| YGR163W   | YDL181W   | YMR150C   | YPL063W   | YDR039C   | YJL063C   |
| YJL225C   | YHR111W   | YNL100W   | YGR082W   | YIR011C   | YGL135W   |
| YHL046C   | YMR026C   | YNL284C   | YLR068W   | YCR040W   | YBR171W   |
| YDR388W   | YLR055C   | YHR188C   | YLR169W   | YAL017W   | YLR079W   |
| YCL001W   | YMR201C   | YDL071C   | YBR054W   | YJR103W   | YFR044C   |
| YCR033W   | YOR007C   | YGL105W   | YMR244C-A | YER021W   | YNR016C   |
| YNL173C   | YOL044W   | YDR266C   | YBR280C   | YJL003W   | YJR055W   |
| YOL017W   | YOR070C   | YEL051W   | YAR068W   | YMR039C   | YPR182W   |
| YPR159W   | YMR156C   | YOR309C   | YOR328W   | YPR037C   | YOL096C   |
| YCR007C   | YDR413C   | YDL125C   | YML106W   | YDR283C   | YDL135C   |
| YBR201W   | YCR060W   | YPL220W   | YJR161C   | YDR381C-A | YCR096C   |
| YFL016C   | YFL002W-A | YHR081W   | YHR016C   | YNL004W   | YCR066W   |
| YNL149C   | YDL174C   | YNR018W   | YOR153W   | YHR072W-A | YDR212W   |
| YBR302C   | YPR020W   | YPL031C   | YER173W   | YBR145W   | YKL214C   |
| YGR237C   | YNL286W   | YDR072C   | YOR142W-A | YHR047C   | YCR081W   |
| YPL179W   | YOR073W   | YBR084W   | YIL149C   | YEL047C   | YCR039C   |
| YGR243W   | YMR188C   | YKL024C   | YKL098W   | YBL086C   | YGL189C   |
| YML051W   | YOR346W   | YGR210C   | YPR202W   | YBL055C   | YPL054W   |
| YKL096W   | YNL168C   | YGR196C   | YKL106C-A | YOR062C   | YOR348C   |
| YBR078W   | YOR122C   | YCL066W   | YDR330W   | YGL096W   | YML085C   |
| YKL087C   | YMR291W   | YBR043C   | YLR356W   | YDR418W   | YBR282W   |
| YGR153W   | YPL226W   | YDR135C   | YKR092C   | YPL198W   | YMR089C   |
| YAL041W   | YBR194W   | YGR198W   | YHR027C   | YDL126C   | YHL015W   |
| YPL222W   | YBR172C   | YMR314W   | YMR043W   | YKL199C   | YBR183W   |
| YML107C   | YOR087W   | YIR010W   | YOR079C   | YER094C   | YOR075W   |
| YEL012W   | YPL011C   | YGL130W   | YJR050W   | YMR056C   | YNL339C   |
| YGR138C   | YOL151W   | YGR024C   | YFR001W   | YER131W   | YFL002W-B |
| YLR467W   | YOR370C   | YDR327W   | YDR527W   | YOR361C   | YHR098C   |
| YDR231C   | YJL084C   | YNL047C   | YOR396W   | YBR016W   | YGL084C   |
| YGR197C   | YLR199C   | YPL047W   | YNR035C   | YMR174C   | YDR152W   |
| YBL036C   | YCR077C   | YBR159W   | YDR322C-A | YOR323C   | YOL052C   |
| YDR287W   | YMR157C   | YLR156W   | YKR002W   | YLL014W   | YDR348C   |
| YCR094W   | YER002W   | YAL046C   | YBR173C   | YBL078C   | YNR037C   |
| YOR059C   | YGL122C   | YLR152C   | YBR270C   | YAR035W   | YML110C   |
| YGR008C   | YFR014C   | YBL042C   | YPR013C   | YOR119C   | YJL036W   |
| YNL092W   | YDR326C   | YIR037W   | YPR163C   | YGR101W   | YLR201C   |

|           |           |           |           |
|-----------|-----------|-----------|-----------|
| YDR196C   | YBR268W   | YGR019W   | YJL037W   |
| YGL185C   | YDR297W   | YMR107W   | YMR304W   |
| YKL159C   | YPL207W   | YKL146W   | YBR072W   |
| YBL040C   | YNL244C   | YOR118W   | YDR121W   |
| YOL111C   | YOR076C   | YLR204W   | YLR157C-A |
| YOR178C   | YDR383C   | YOR103C   | YHR056C   |
| YPL274W   | YBL027W   | YGR161C   | YML034W   |
| YER155C   | YIL165C   | YJL165C   | YLR420W   |
| YDR261C-C | YDR256C   | YJL186W   | YBL091C   |
| YDR040C   | YOR261C   | YOR081C   | YDR098C-A |
| YNL136W   | YBL087C   | YBR108W   | YML016C   |
| YKL080W   | YMR208W   | YIL014C-A | YOR262W   |
| Q0080     | YER047C   | YDR264C   | YPR137C-A |
| YPL111W   | YLR350W   | YDR373W   | YFR052W   |
| YKL066W   | YKL072W   | YGR085C   | YDL234C   |
| YOL143C   | YGR200C   | YNL080C   | YPR158W-A |
| YER122C   | YBR012W-A | YJL102W   | YHR143W-A |
| YAR014C   | YGR027W-A | YPR165W   | YIL039W   |
| YDR210W-C | YGR119C   | YAL043C-A | YHR115C   |
| YGL068W   | YEL015W   | YHR137W   | YGR161C-C |
| YKR091W   | YDR216W   | YCR030C   | YMR035W   |
| YDR145W   | YOR329C   | YCR093W   | YCR028C-A |
| YJL088W   | YDR100W   | YMR271C   | YNL054W-A |
| YGR102C   | YDR263C   | YER190W   | YHR034C   |
| YPR137C-B | YMR097C   | YKL035W   | YDL053C   |
| YGR161C-D | YHR040W   | YHL002W   | YDR378C   |
| YDL002C   | YDR023W   | YGR285C   | YPR145W   |
| YGL043W   | YPL127C   | YCR017C   | YJR135W-A |
| YBR129C   | YHR025W   | YPL133C   | YJR046W   |
| YDR441C   | YIL038C   | YMR051C   | YPL169C   |
| YLL066C   | YEL065W   | YDR261C-D | YOR215C   |
| YMR099C   | YDR435C   | YDR483W   | YKL206C   |
| YGL078C   | YOL159C-A | YOR110W   | YFR015C   |
| YDL147W   | YOR069W   | YER119C   | YDR224C   |
| YGR222W   | YJL044C   | YPL212C   | YDR265W   |
| YMR191W   | YKL073W   | YNL306W   |           |
| YBL092W   | YER159C-A | YMR278W   |           |
| YLR271W   | YGR175C   | YKL126W   |           |
| YBL071W-A | YOL103W-A | YJR049C   |           |
| YBL093C   | YPL079W   | YOR259C   |           |
| YBL058W   | YNL074C   | YKL210W   |           |
| YJL155C   | YJR004C   | YOR244W   |           |
| YOR040W   | YHR017W   | YHL050C   |           |
| YBR149W   | YPL234C   | YBR273C   |           |
| YDL051W   | YDL082W   | YKR066C   |           |
| YOR131C   | YAL054C   | YHR053C   |           |
| YPL215W   | YCR088W   | YLR197W   |           |
| YLR165C   | YBR265W   | YNL053W   |           |
| YML101C   | YOR318C   | YAL055W   |           |
| YGL047W   | YGR007W   | YMR170C   |           |
| YDR304C   | YDR316W-A | YLR377C   |           |
| YJL014W   | YMR308C   | YGL231C   |           |
| YMR217W   | YDR063W   | YHR042W   |           |
| YOL103W   | YDR006C   | YLR256W-A |           |
| YIL172C   | YMR041C   | YDR545W   |           |
| YOR270C   | YBR255C-A | YOL061W   |           |
| YMR276W   | YER148W   | YHR069C   |           |

|                                                     |             |
|-----------------------------------------------------|-------------|
| Stationary phase protease                           | Probability |
| generation of precursor metabolites and energy      | 9.64E-13    |
| main pathways of carbohydrate metabolism            | 3.94E-12    |
| Ty element transposition                            | 4.78E-10    |
| transposition, DNA-mediated                         | 7.30E-10    |
| transposition                                       | 7.30E-10    |
| energy derivation by oxidation of organic compounds | 9.35E-10    |
| cofactor metabolism                                 | 2.04E-09    |
| coenzyme metabolism                                 | 2.44E-09    |
| organic acid metabolism                             | 1.77E-08    |
| carboxylic acid metabolism                          | 1.77E-08    |
| carbohydrate metabolism                             | 1.10E-07    |
| acetyl-CoA metabolism                               | 1.59E-07    |
| tricarboxylic acid cycle intermediate metabolism    | 4.12E-07    |
| cellular carbohydrate metabolism                    | 5.03E-07    |
| tricarboxylic acid cycle                            | 6.56E-07    |
| acetyl-CoA catabolism                               | 6.56E-07    |
| coenzyme catabolism                                 | 2.75E-06    |
| cofactor catabolism                                 | 5.23E-06    |
| pyruvate metabolism                                 | 8.83E-06    |
| DNA recombination                                   | 1.14E-05    |
| alcohol biosynthesis                                | 1.37E-05    |
| amino acid biosynthesis                             | 2.05E-05    |
| hydrogen transport                                  | 3.07E-05    |
| proton transport                                    | 3.07E-05    |
| glutamine family amino acid metabolism              | 3.45E-05    |
| nucleotide metabolism                               | 3.56E-05    |
| hexose biosynthesis                                 | 4.86E-05    |
| monosaccharide biosynthesis                         | 4.86E-05    |
| nitrogen compound biosynthesis                      | 5.46E-05    |
| amine biosynthesis                                  | 5.46E-05    |
| glucose metabolism                                  | 5.96E-05    |
| oxidative phosphorylation                           | 8.79E-05    |
| catabolism                                          | 8.83E-05    |
| hexose metabolism                                   | 9.39E-05    |
| cellular catabolism                                 | 9.95E-05    |
| glutamine family amino acid biosynthesis            | 0.00011     |
| glutamate metabolism                                | 0.00015     |
| monosaccharide metabolism                           | 0.00017     |
| alcohol metabolism                                  | 0.00019     |
| gluconeogenesis                                     | 0.00025     |
| monovalent inorganic cation transport               | 0.00033     |
| pyridine nucleotide metabolism                      | 0.00036     |
| vitamin metabolism                                  | 0.00036     |
| water-soluble vitamin metabolism                    | 0.00036     |
| carbohydrate biosynthesis                           | 0.00052     |
| cellular respiration                                | 0.00053     |
| glutamate biosynthesis                              | 0.00055     |
| purine ribonucleoside triphosphate metabolism       | 0.00061     |
| purine ribonucleoside triphosphate biosynthesis     | 0.00061     |
| purine nucleoside triphosphate metabolism           | 0.00061     |
| purine nucleoside triphosphate biosynthesis         | 0.00061     |
| cofactor biosynthesis                               | 0.00064     |
| glucose catabolism                                  | 0.00065     |
| aerobic respiration                                 | 0.00078     |
| hexose catabolism                                   | 0.00088     |
| NADPH regeneration                                  | 0.00093     |
| ATP metabolism                                      | 0.00095     |
| nucleoside phosphate metabolism                     | 0.00095     |

|                                                                |         |
|----------------------------------------------------------------|---------|
| energy coupled proton transport, down electrochemical gradient | 0.00095 |
| ATP synthesis coupled proton transport                         | 0.00095 |
| ATP biosynthesis                                               | 0.00095 |
| oxidoreduction coenzyme metabolism                             | 0.00101 |
| cell wall organization and biogenesis                          | 0.00102 |
| external encapsulating structure organization and biogenesis   | 0.00102 |
| homeostasis                                                    | 0.00107 |
| alcohol catabolism                                             | 0.00112 |
| nicotinamide metabolism                                        | 0.00117 |
| ribonucleoside triphosphate biosynthesis                       | 0.00127 |
| ribonucleoside triphosphate metabolism                         | 0.00127 |
| monosaccharide catabolism                                      | 0.00132 |
| purine ribonucleotide biosynthesis                             | 0.00132 |
| response to stress                                             | 0.00164 |
| isocitrate metabolism                                          | 0.00201 |
| coenzyme biosynthesis                                          | 0.00204 |
| purine ribonucleotide metabolism                               | 0.00219 |
| ribonucleotide biosynthesis                                    | 0.00219 |
| ribosomal small subunit assembly and maintenance               | 0.00223 |
| nucleoside triphosphate biosynthesis                           | 0.00244 |
| phosphorylation                                                | 0.00269 |
| amino acid metabolism                                          | 0.00275 |
| endocytosis                                                    | 0.00275 |
| cell homeostasis                                               | 0.00283 |
| cation transport                                               | 0.00288 |
| protein targeting to mitochondrion                             | 0.00297 |
| ion transport                                                  | 0.00315 |
| nucleoside triphosphate metabolism                             | 0.00329 |
| amino acid and derivative metabolism                           | 0.00334 |
| NADP metabolism                                                | 0.00341 |
| ribonucleotide metabolism                                      | 0.0035  |
| nucleotide biosynthesis                                        | 0.00364 |
| dicarboxylic acid metabolism                                   | 0.00434 |
| purine nucleotide biosynthesis                                 | 0.00436 |
| group transfer coenzyme metabolism                             | 0.00436 |
| response to oxidative stress                                   | 0.00437 |
| mitochondrion distribution                                     | 0.00513 |
| mitochondrion localization                                     | 0.00513 |
| mitochondrion inheritance                                      | 0.00513 |
| regulation of protein metabolism                               | 0.0054  |
| calcium-dependent cell-cell adhesion                           | 0.00541 |
| flocculation via cell wall protein-carbohydrate interaction    | 0.00541 |
| asparagine metabolism                                          | 0.00541 |
| flocculation                                                   | 0.00541 |
| mitochondrial electron transport, succinate to ubiquinone      | 0.00561 |
| regulation of transcription from RNA polymerase I promoter     | 0.00561 |
| glycolysis                                                     | 0.00598 |
| electron transport                                             | 0.00612 |
| oxygen and reactive oxygen species metabolism                  | 0.00621 |
| ion homeostasis                                                | 0.00637 |
| regulation of biosynthesis                                     | 0.0065  |
| regulation of cellular biosynthesis                            | 0.0065  |
| protein folding                                                | 0.00653 |
| protein catabolism                                             | 0.00667 |
| cellular protein catabolism                                    | 0.0074  |
| purine nucleotide metabolism                                   | 0.00802 |
| regulation of transcription from RNA polymerase III promoter   | 0.00816 |
| heterophilic cell adhesion                                     | 0.00851 |
| aspartate family amino acid catabolism                         | 0.00882 |

|                                                                            |         |
|----------------------------------------------------------------------------|---------|
| cellular macromolecule catabolism                                          | 0.00918 |
| regulation of translation                                                  | 0.00966 |
| response to stimulus                                                       | 0.01038 |
| amine metabolism                                                           | 0.01079 |
| regulation of pH                                                           | 0.01131 |
| regulation of protein biosynthesis                                         | 0.01195 |
| cellular response to nitrogen starvation                                   | 0.01197 |
| asparagine catabolism                                                      | 0.01197 |
| cellular response to nitrogen levels                                       | 0.01197 |
| regulation of translational initiation                                     | 0.01197 |
| cell-cell adhesion                                                         | 0.01236 |
| cell redox homeostasis                                                     | 0.01354 |
| regulation of cell redox homeostasis                                       | 0.01354 |
| pentose-phosphate shunt                                                    | 0.01354 |
| cellular localization                                                      | 0.01364 |
| ATP synthesis coupled electron transport (sensu Eukaryota)                 | 0.01366 |
| ATP synthesis coupled electron transport                                   | 0.01366 |
| response to water deprivation                                              | 0.01385 |
| response to water                                                          | 0.01385 |
| pyridoxine metabolism                                                      | 0.01385 |
| vitamin B6 metabolism                                                      | 0.01385 |
| response to desiccation                                                    | 0.01385 |
| phosphate metabolism                                                       | 0.01525 |
| phosphorus metabolism                                                      | 0.01525 |
| macromolecule catabolism                                                   | 0.0157  |
| malate metabolism                                                          | 0.01606 |
| cell ion homeostasis                                                       | 0.01955 |
| nitrogen compound metabolism                                               | 0.0197  |
| serine family amino acid biosynthesis                                      | 0.0198  |
| mitochondrial protein processing                                           | 0.0217  |
| glycine metabolism                                                         | 0.0217  |
| mitochondrion organization and biogenesis                                  | 0.02174 |
| translational initiation                                                   | 0.02352 |
| cellular response to stimulus                                              | 0.02355 |
| response to starvation                                                     | 0.02355 |
| cellular response to extracellular stimulus                                | 0.02355 |
| cellular response to starvation                                            | 0.02355 |
| cellular response to nutrient levels                                       | 0.02355 |
| ubiquitin cycle                                                            | 0.02552 |
| cell adhesion                                                              | 0.02571 |
| amino acid catabolism                                                      | 0.02706 |
| proteolysis                                                                | 0.02725 |
| glutamine family amino acid catabolism                                     | 0.02778 |
| proteolysis during cellular protein catabolism                             | 0.03004 |
| aromatic compound biosynthesis                                             | 0.03117 |
| fermentation                                                               | 0.03117 |
| SRP-dependent cotranslational protein targeting to membrane, translocation | 0.03205 |
| budding cell isotropic bud growth                                          | 0.03205 |
| vacuolar protein catabolism                                                | 0.03205 |
| glyoxylate metabolism                                                      | 0.03356 |
| glyoxylate cycle                                                           | 0.03356 |
| citrate metabolism                                                         | 0.03356 |
| fatty acid metabolism                                                      | 0.03368 |
| NAD biosynthesis                                                           | 0.0352  |
| organelle inheritance                                                      | 0.03716 |
| ubiquitin-dependent protein catabolism                                     | 0.03828 |
| modification-dependent protein catabolism                                  | 0.03828 |
| modification-dependent macromolecule catabolism                            | 0.03828 |
| thiamin and derivative biosynthesis                                        | 0.04029 |



|                                                           |         |
|-----------------------------------------------------------|---------|
| intracellular transport                                   | 0.04468 |
| amine catabolism                                          | 0.04793 |
| nitrogen compound catabolism                              | 0.04793 |
| positive regulation of gluconeogenesis                    | 0.0481  |
| glycine biosynthesis                                      | 0.0481  |
| G-protein signaling, adenylate cyclase activating pathway | 0.0481  |
| acetyl-CoA biosynthesis from pyruvate                     | 0.0481  |
| nucleotide-sugar biosynthesis                             | 0.0481  |
| sequestering of metal ion                                 | 0.0481  |
| lysyl-tRNA aminoacylation                                 | 0.0481  |
| intracellular sequestering of iron ion                    | 0.0481  |
| mannose biosynthesis                                      | 0.0481  |
| GDP-mannose metabolism                                    | 0.0481  |
| GDP-mannose biosynthesis                                  | 0.0481  |
| inositolphosphoceramide metabolism                        | 0.0481  |
| L-serine metabolism                                       | 0.0481  |
| L-serine biosynthesis                                     | 0.0481  |
| 2-oxoglutarate metabolism                                 | 0.0481  |
| negative regulation of protein metabolism                 | 0.04947 |
| heterocycle metabolism                                    | 0.05163 |
| purine ribonucleoside metabolism                          | 0.05263 |
| cell separation during cytokinesis                        | 0.05263 |
| establishment of cellular localization                    | 0.0539  |
| DNA metabolism                                            | 0.05699 |
| cation homeostasis                                        | 0.05701 |
| propionate metabolism                                     | 0.05786 |
| folic acid and derivative biosynthesis                    | 0.05786 |
| actin filament bundle formation                           | 0.05786 |
| actin cable formation                                     | 0.05786 |
| intron homing                                             | 0.05786 |
| attachment of GPI anchor to protein                       | 0.05786 |
| protein targeting                                         | 0.05881 |
| vitamin biosynthesis                                      | 0.05889 |
| water-soluble vitamin biosynthesis                        | 0.05889 |
| 'de novo' pyrimidine base biosynthesis                    | 0.06066 |
| cellular pH reduction                                     | 0.06182 |
| regulation of cellular pH                                 | 0.06182 |
| hydrogen ion homeostasis                                  | 0.06182 |
| pH reduction                                              | 0.06182 |
| vacuolar acidification                                    | 0.06182 |
| serine family amino acid metabolism                       | 0.06182 |
| pigment biosynthesis                                      | 0.06333 |
| thiamin and derivative metabolism                         | 0.06333 |
| glucan biosynthesis                                       | 0.06333 |
| branched chain family amino acid metabolism               | 0.06336 |
| aromatic amino acid family biosynthesis                   | 0.06336 |
| carbohydrate catabolism                                   | 0.06374 |
| cellular carbohydrate catabolism                          | 0.06374 |
| response to abiotic stimulus                              | 0.06413 |
| monovalent inorganic cation homeostasis                   | 0.06665 |
| protein modification                                      | 0.06698 |
| aromatic compound metabolism                              | 0.06976 |
| actin filament organization                               | 0.0723  |
| polyol metabolism                                         | 0.07395 |
| purine nucleoside metabolism                              | 0.07395 |
| glycerol metabolism                                       | 0.07395 |
| ergosterol biosynthesis                                   | 0.0742  |
| ergosterol metabolism                                     | 0.0742  |
| response to external stimulus                             | 0.0742  |

|                                                |         |
|------------------------------------------------|---------|
| response to extracellular stimulus             | 0.0742  |
| response to nutrient levels                    | 0.0742  |
| pigment metabolism                             | 0.07733 |
| nucleobase biosynthesis                        | 0.07733 |
| asexual reproduction                           | 0.07889 |
| cell budding                                   | 0.07889 |
| NAD metabolism                                 | 0.07903 |
| branched chain family amino acid biosynthesis  | 0.07903 |
| Ras protein signal transduction                | 0.07933 |
| thiamin biosynthesis                           | 0.07933 |
| transcription from RNA polymerase III promoter | 0.0832  |
| intracellular protein transport                | 0.0881  |
| purine ribonucleoside salvage                  | 0.08837 |
| negative regulation of cellular biosynthesis   | 0.08837 |
| negative regulation of translation             | 0.08837 |
| negative regulation of biosynthesis            | 0.08837 |
| poly(A)+ mRNA export from nucleus              | 0.08837 |
| negative regulation of protein biosynthesis    | 0.08837 |
| microautophagy                                 | 0.08837 |
| organic cation transport                       | 0.08837 |
| ammonium transport                             | 0.08837 |
| nucleoside salvage                             | 0.08837 |
| cytokinesis, completion of separation          | 0.08837 |
| protein processing                             | 0.08949 |
| biopolymer catabolism                          | 0.09029 |
| protein import into mitochondrial matrix       | 0.093   |
| budding cell bud growth                        | 0.09615 |
| non-developmental growth                       | 0.09615 |
| regulation of phosphorylation                  | 0.09681 |
| actin nucleation                               | 0.09681 |
| glycosphingolipid metabolism                   | 0.09681 |
| isoleucine metabolism                          | 0.09681 |
| glycosphingolipid biosynthesis                 | 0.09681 |
| protein-tetrapyrrole linkage                   | 0.09681 |
| protein-heme linkage                           | 0.09681 |
| glycerol biosynthesis                          | 0.09681 |
| mannose metabolism                             | 0.09681 |
| homoserine biosynthesis                        | 0.09681 |
| glycolipid biosynthesis                        | 0.09681 |
| glycolipid metabolism                          | 0.09681 |
| negative regulation of phosphorylation         | 0.09681 |
| polyol biosynthesis                            | 0.09681 |
| cytochrome c-heme linkage                      | 0.09681 |
| negative regulation of phosphate metabolism    | 0.09681 |
| thiamin metabolism                             | 0.09734 |
| mRNA polyadenylation                           | 0.09734 |
| RNA polyadenylation                            | 0.09734 |
| establishment of protein localization          | 0.09795 |
| indolalkylamine metabolism                     | 0.09896 |
| indole derivative biosynthesis                 | 0.09896 |
| iron-sulfur cluster assembly                   | 0.09896 |
| indolalkylamine biosynthesis                   | 0.09896 |
| tryptophan biosynthesis                        | 0.09896 |
| ribonucleoside metabolism                      | 0.09896 |
| arginine biosynthesis                          | 0.09896 |
| tryptophan metabolism                          | 0.09896 |
| pyridine nucleotide biosynthesis               | 0.09896 |
| metallo-sulfur cluster assembly                | 0.09896 |
| indole derivative metabolism                   | 0.09896 |

|                                                               |         |
|---------------------------------------------------------------|---------|
| polyamine transport                                           | 0.09896 |
| indole and derivative metabolism                              | 0.09896 |
| aromatic amino acid family biosynthesis, anthranilate pathway | 0.09896 |
| aspartate family amino acid metabolism                        | 0.09906 |
| Not yet annotated                                             |         |

## Aging Genes

|           |         |         |         |
|-----------|---------|---------|---------|
| YCL025C   | YGR237C | YPL145C | YOR268C |
| YJL129C   | YKL027W | YBL066C | YAL067C |
| YIL094C   | YGR054W | YNR049C | YDR018C |
| YDR019C   | YNL021W | YPR157W | YBR016W |
| YER091C-A | YKL015W | YER059W | YPR005C |
| YHR204W   | YDR262W | YBR018C | YLR278C |
| YDL173W   | YBR019C | YBR072W | YKL034W |
| YDL172C   | YHR126C | YBL107C | YJL096W |
| YLL007C   | YML066C | YJL132W | YPR029C |
| YGR057C   | YBL042C | YLR187W | YDL049C |
| YGL197W   | YPR031W | YIL168W | YKL150W |
| YGR027C   | YBR030W | YIL121W | YMR118C |
| YML121W   | YHR003C | YNR056C | YDR357C |
| YHL034C   | YBR248C | YPR151C | YKL184W |
| YLL013C   | YKL001C | YGL079W | YBR116C |
| YBR077C   | YKL081W | YIR023W | YFR017C |
| YJR066W   | YHR064C | YGR291C | YNR070W |
| YEL014C   | YER132C | YCL013W | YJL094C |
| YKL046C   | YGR289C | YOL106W | YFL055W |
| YDR221W   | YPL042C | YBR015C | YLR422W |
| YHR158C   | YGR153W | YMR326C | YPL026C |
| YPL182C   | YNL014W | YKL176C | YDR443C |
| YGL203C   | YDR515W | YPL017C | YPL009C |
| YJL165C   | YGL195W | YLR327C | YER170W |
| YGR163W   | YGR045C | YBR013C | YGR250C |
| YLR152C   | YIL056W | YBR071W | YBL087C |
| YOR179C   | YKL068W | YPL150W | YBR040W |
| YNL142W   | YGR059W | YBR114W | YPR091C |
| YPR158W   | YBL103C | YGL248W | YJL103C |
| YHR139C   | YKL216W | YPR009W | YEL008W |
| YGR043C   | YHR111W | YDL053C |         |
| YKR007W   | YGL083W | YKR087C |         |
| YPL133C   | YNL016W | YIL159W |         |
| YGR044C   | YLR455W | YIL131C |         |
| YOL116W   | YBR012C | YLL015W |         |
| YCR037C   | YGR108W | YIL030C |         |
| YHR142W   | YMR015C | YJL105W |         |
| YHR125W   | YDL034W | YJL130C |         |
| YDR490C   | YML062C | YPR030W |         |
| YKL175W   | YCR048W | YGR292W |         |
| YGL252C   | YHR161C | YPL071C |         |
| YKR095W   | YGL057C | YDR143C |         |
| YBL102W   | YIL173W | YDL182W |         |
| YHR167W   | YGR107W | YEL049W |         |
| YGL139W   | YKR009C | YKR015C |         |
| YIL156W   | YHR159W | YPL034W |         |
| YHR124W   | YER137C | YIL140W |         |
| YHR195W   | YKL044W | YDL216C |         |
| YLR428C   | YPR156C | YNL268W |         |
| YPR138C   | YHR157W | YLR461W |         |
| YHR209W   | YBR028C | YEL037C |         |
| YPR021C   | YPR011C | YDR229W |         |
| YER040W   | YIL157C | YOR155C |         |
| YKR034W   | YPR114W | YNL011C |         |
| YFR041C   | YIL058W | YJL078C |         |
| YGL033W   | YDL215C | YHR113W |         |
|           | YBR220C | YIL100W |         |

8/30/07

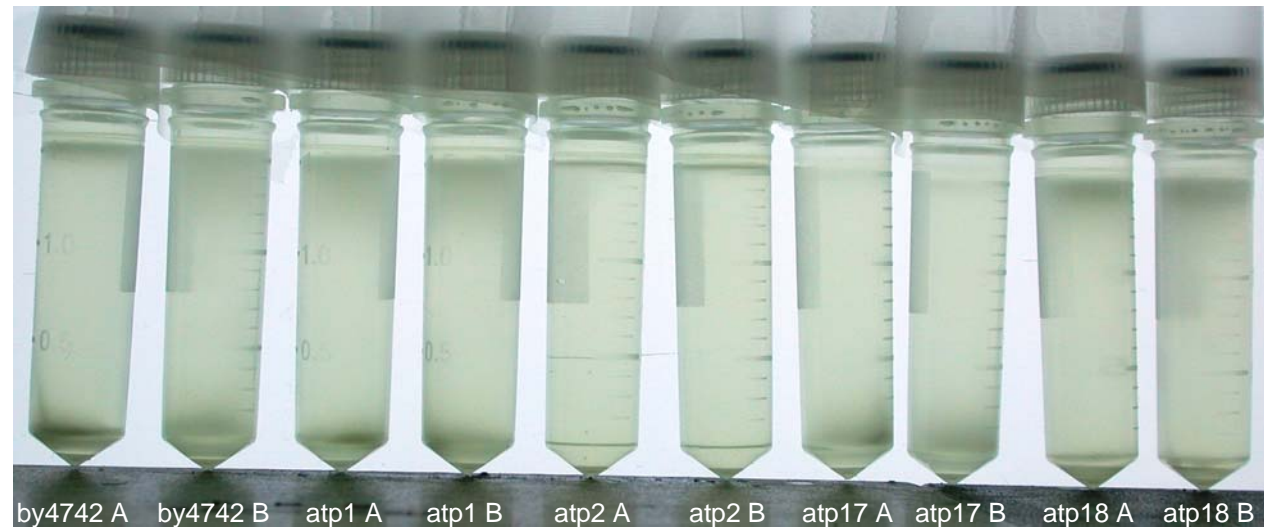

No lower band

\*pictures were autocorrected

9/12/07

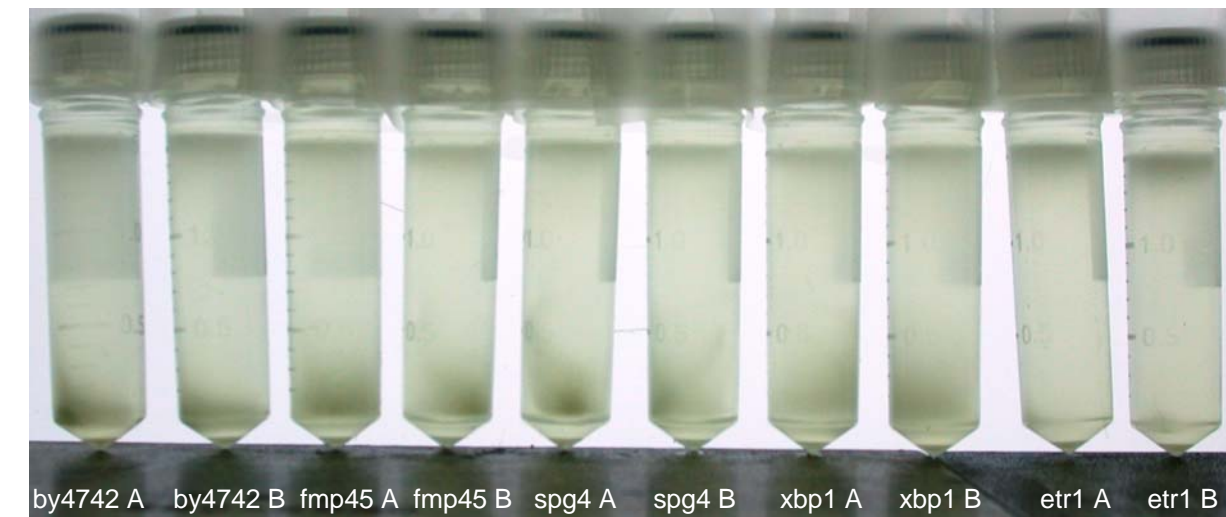

9/12/07

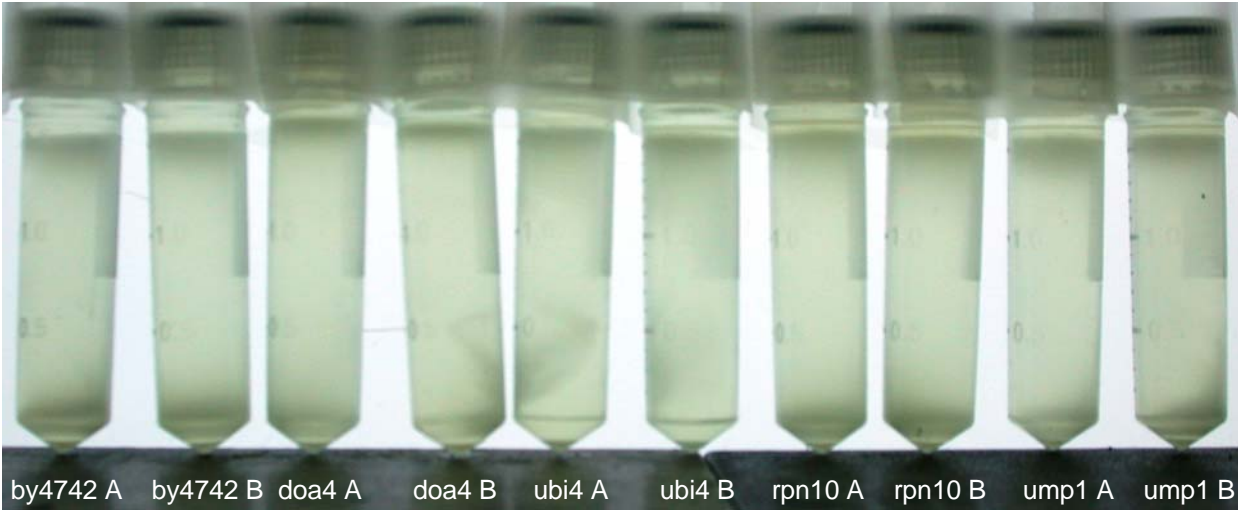

10/16/07

\*pictures were autocorrected

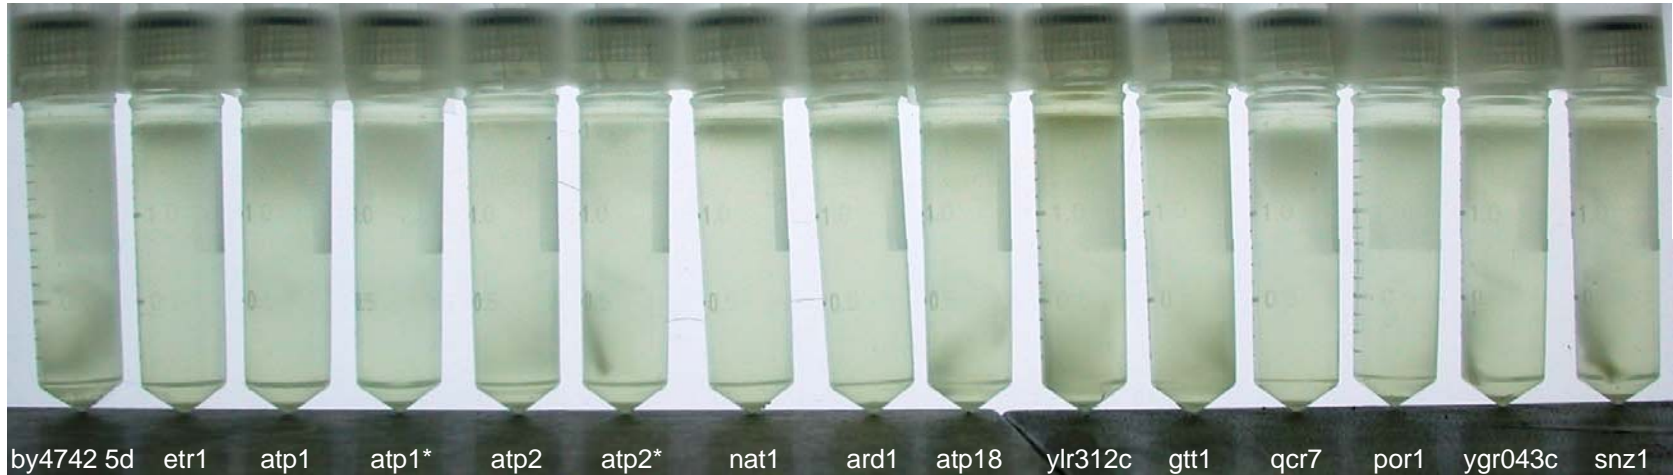

No lower band for etr1, nat1, ard1

-atp1\* and atp2\* are from the micro titer dishes (deletion set)

10/16/07

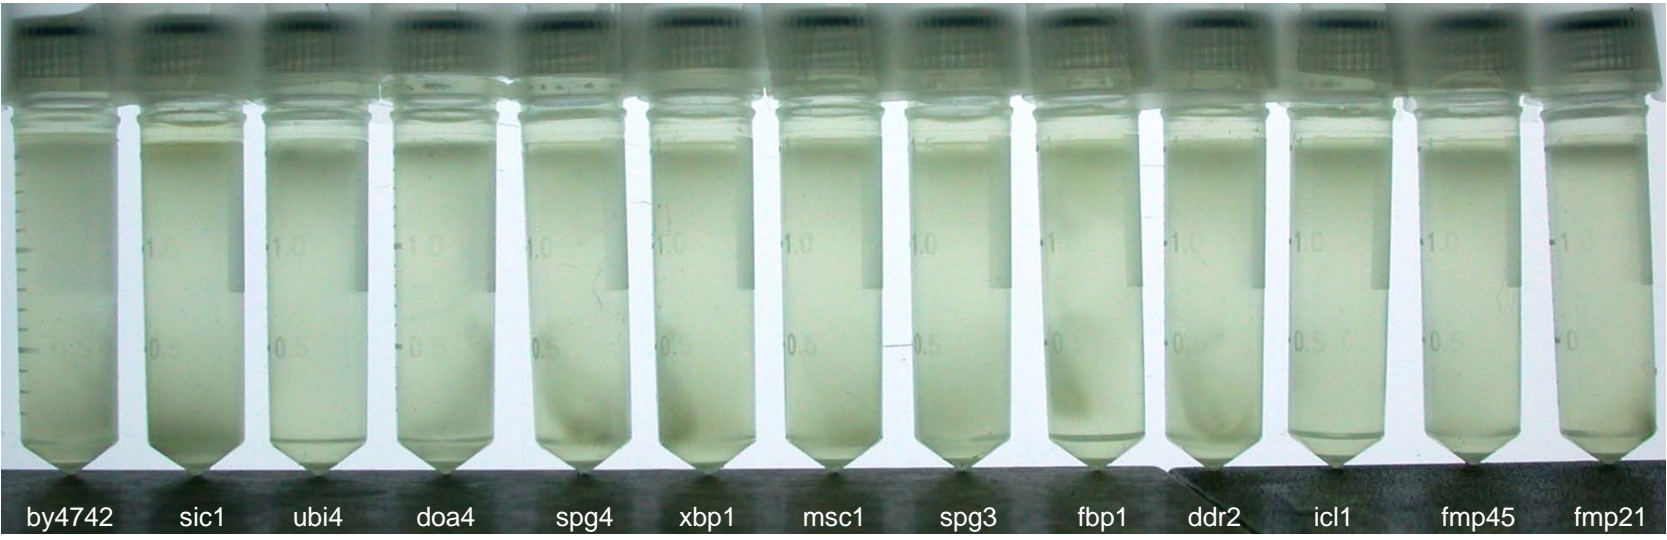

10/26/07

\*pictures were autocorrected

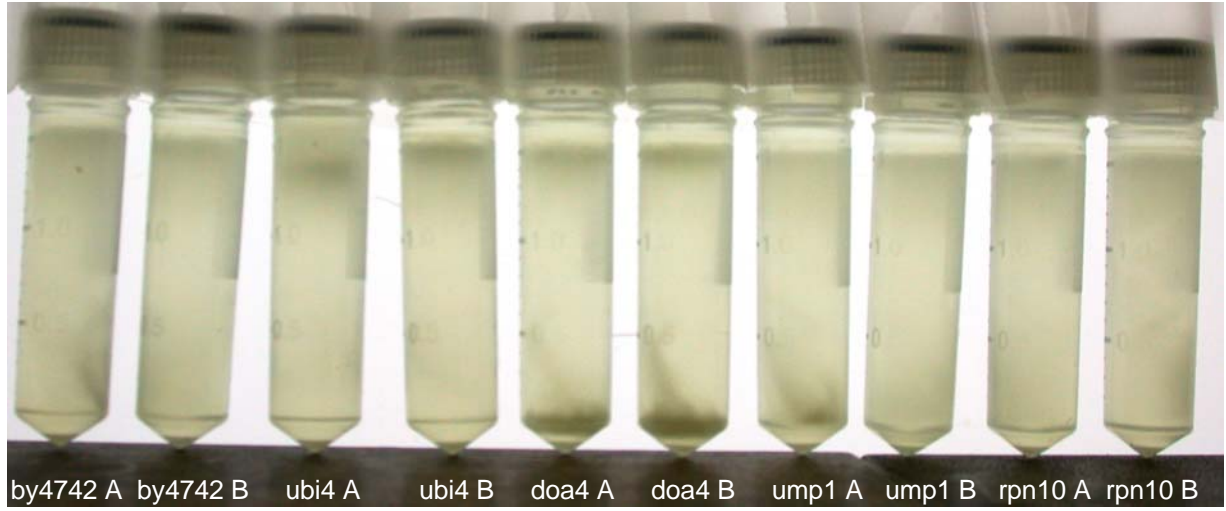

Doa4 seems odd in this picture, look at the high concentration of cells

\*picture was autocorrected

11/2/07

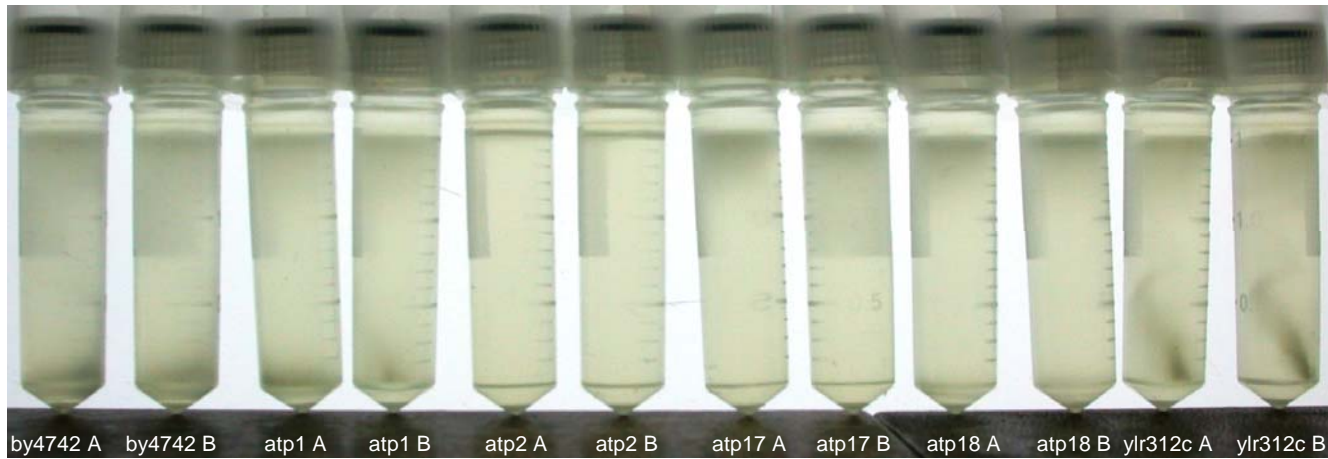

-No lower bands for atp2 and atp17 A&B



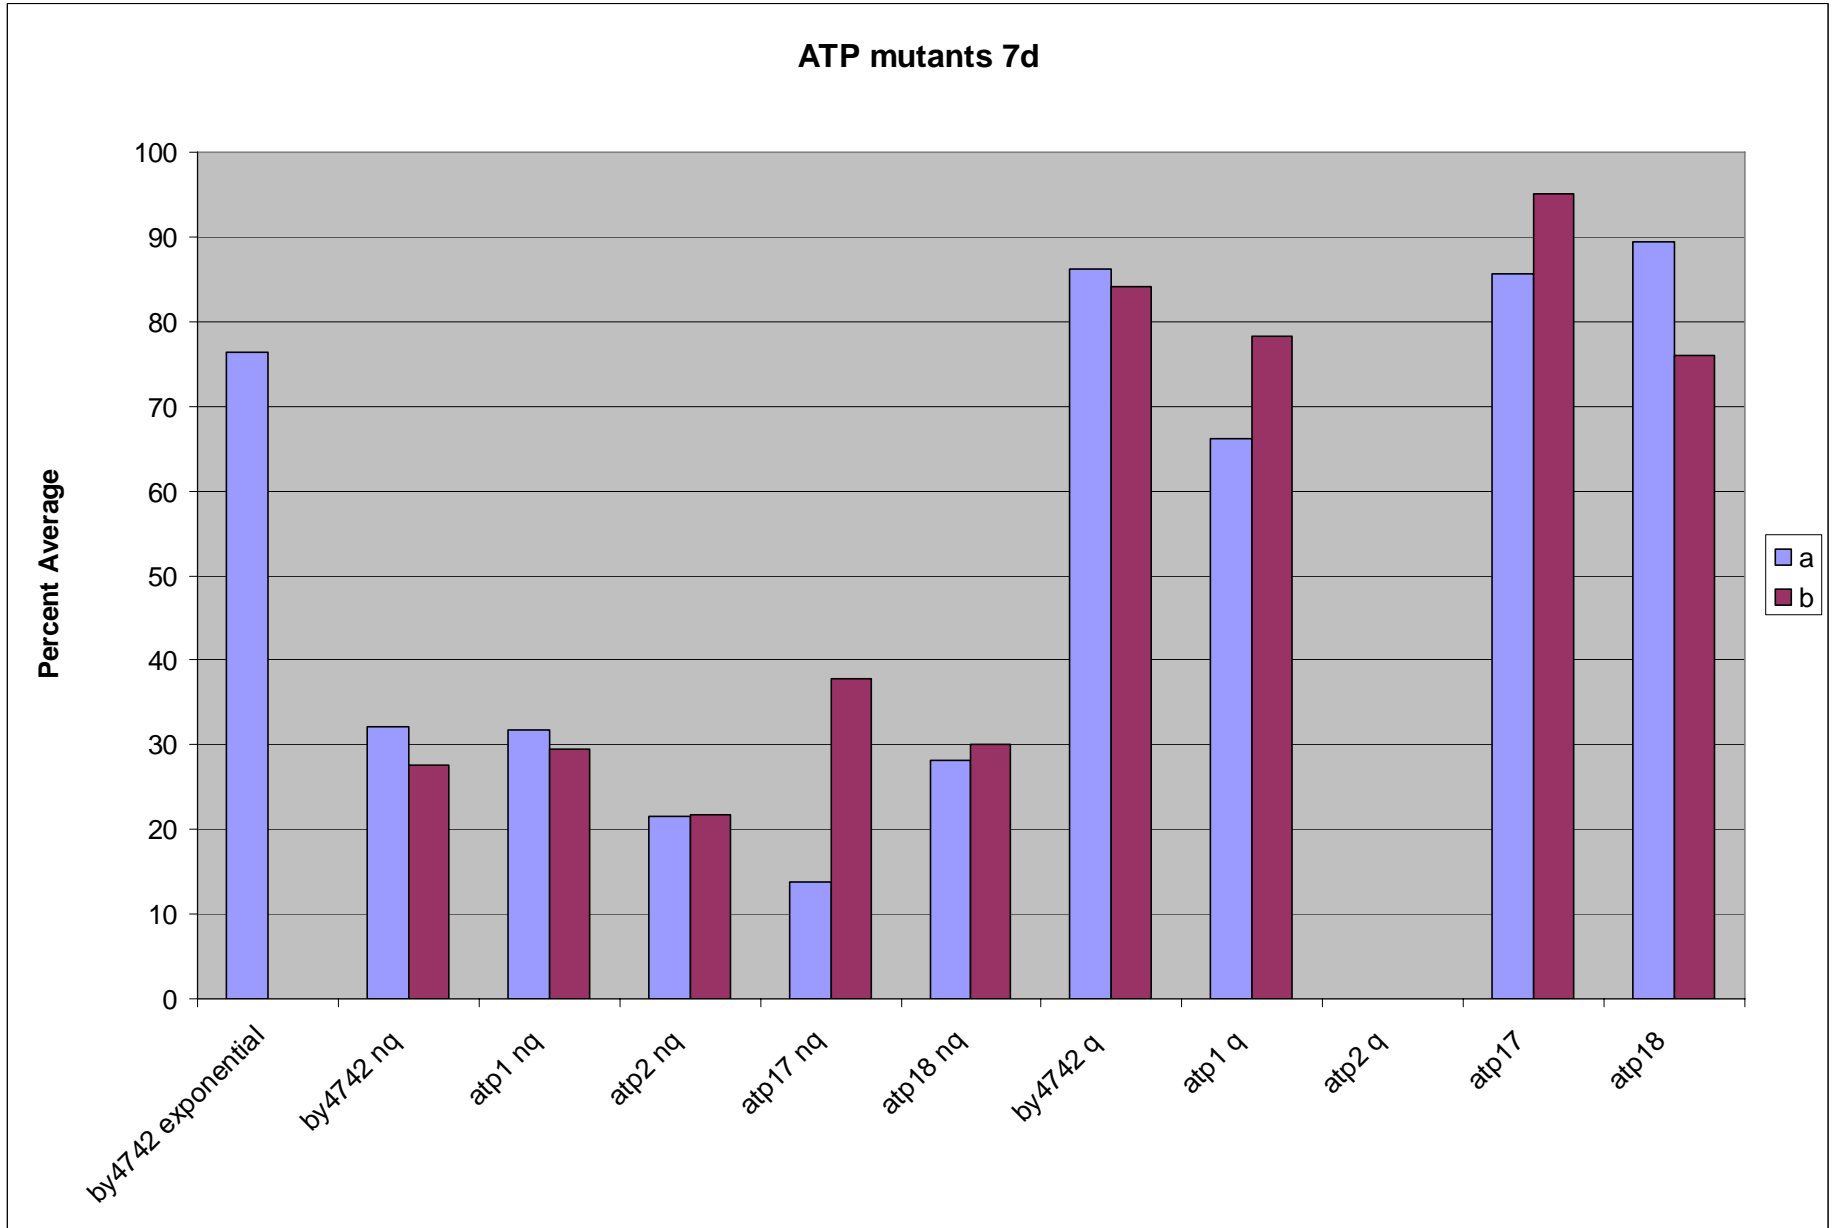

|   | by4742 ex | by4742 nq | atp1 nq | atp2 nq | atp17 nq | atp18 nq | by4742 q | atp1 q  | atp2 q | atp17   | atp18   |
|---|-----------|-----------|---------|---------|----------|----------|----------|---------|--------|---------|---------|
| a | 26.304    | 58.9886   | 69.2987 | 8.52007 | 13.2576  | 100      | 7.22679  | 10.8933 |        | 4.66288 | 8.80246 |
| b |           | 73.3279   | 87.3473 | 14.7179 | 5.46455  | 53.2995  | 6.75071  | 6.22748 |        | 1.70145 | 14.9438 |

Petites for atp mutants 7d

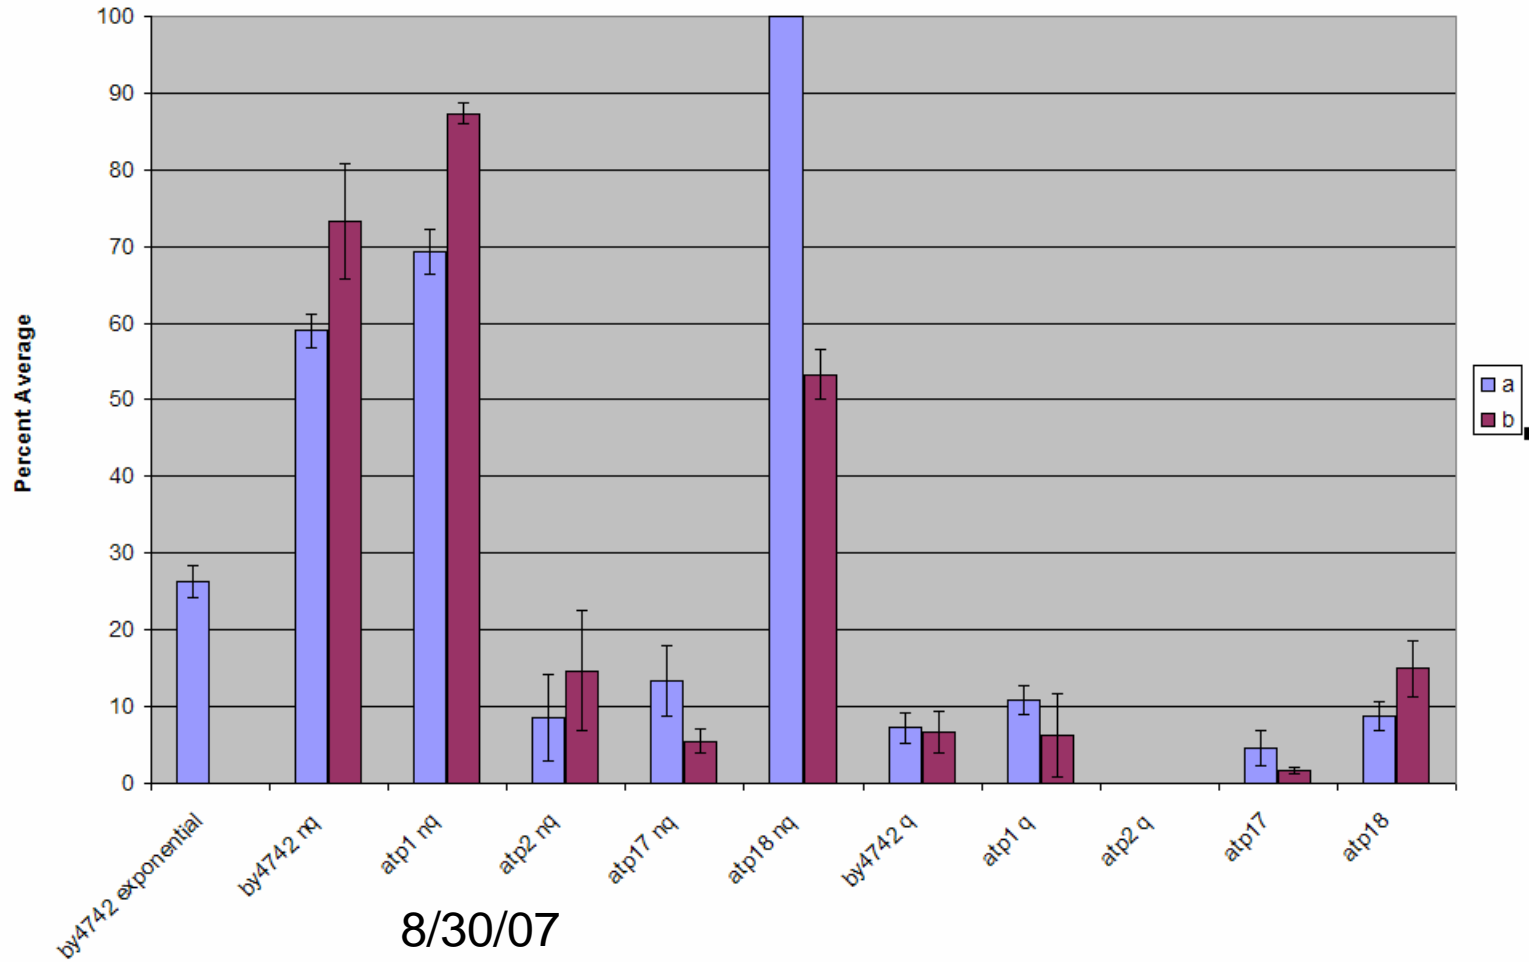

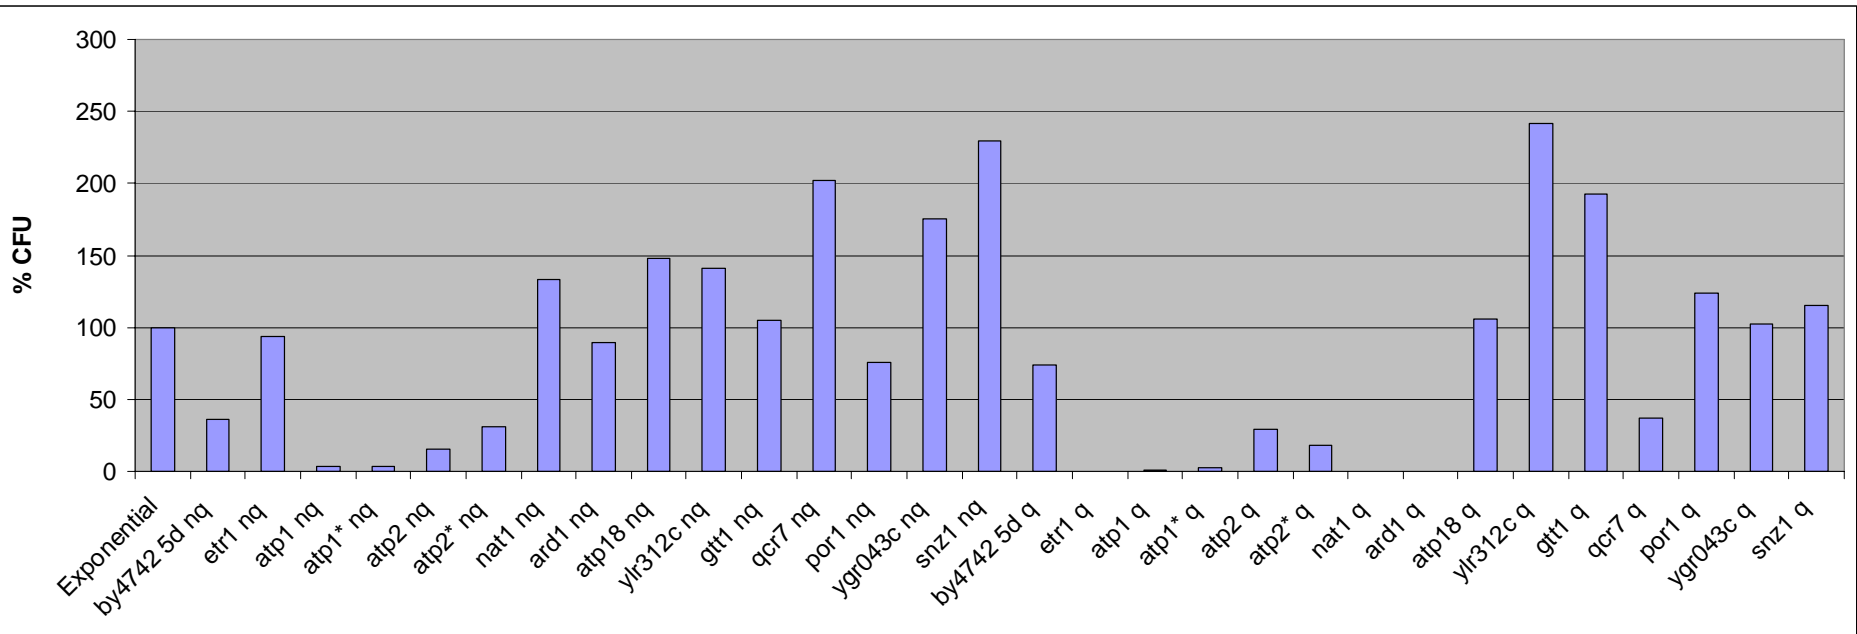

From 10/16/2007 shows atp1,atp2 acting identically, atp18 different

From 10/18/2007

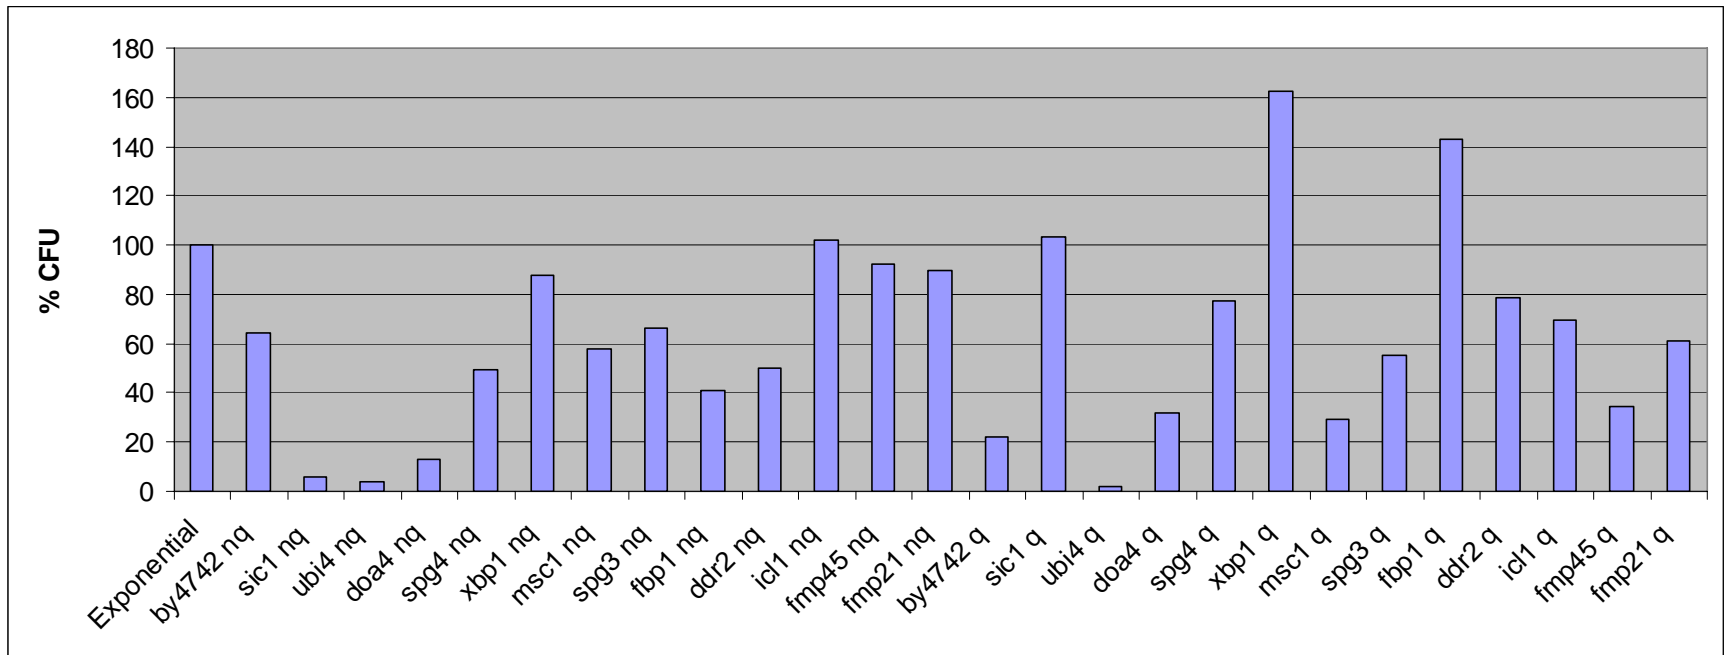

Shows appropriate xbp1 phenotype, ng parental q numbers

11/18/2007

### ATP CFU's

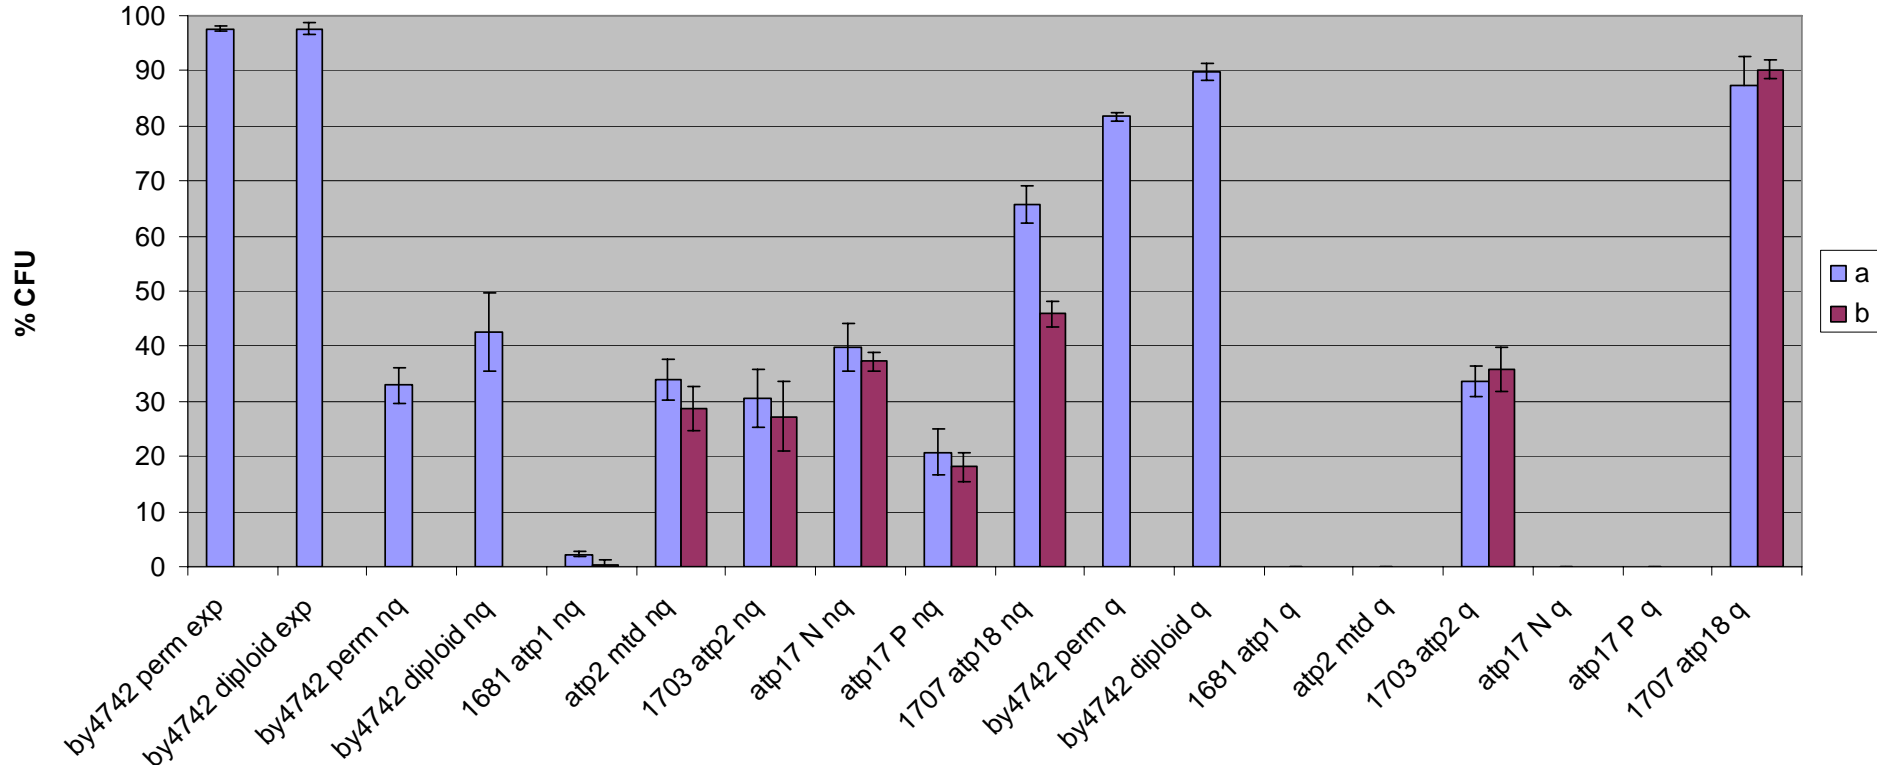

| <b>Table 1S. Change in viability and reproductive capacity of mutants from the parental strain</b> |                                                              |                |                                           |              |                                                                                          |                                                                            |
|----------------------------------------------------------------------------------------------------|--------------------------------------------------------------|----------------|-------------------------------------------|--------------|------------------------------------------------------------------------------------------|----------------------------------------------------------------------------|
| Group                                                                                              | Strain                                                       | Q<br>viability | Q<br>CFU                                  | NQ viability | NQ<br>CFU                                                                                | Function <sup>a</sup>                                                      |
| 1                                                                                                  | <i>SPG4</i>                                                  | NC             | ↓ <b>55% ± 5.2</b>                        | NC           | NC                                                                                       | Unknown                                                                    |
| 2                                                                                                  | <i>YLR312C</i><br><i>GTT1</i>                                | NC             | ↓ <b>79% ± 9.4</b><br>↓ <b>71% ± 19.6</b> | NC           | ↓ <b>75% ± 6.0</b><br>↓ <b>54% ± 11.6</b>                                                | Unknown<br>Glutathione transferase <sup>c</sup>                            |
| 3                                                                                                  | <i>YGR043C</i><br><i>SNZ1</i><br><i>MSC1</i><br><i>FMP21</i> | NC             | NC                                        | NC           | ↓ <b>54% ± 13.4</b><br>↓ <b>52% ± 17.6</b><br>↓ <b>57% ± 16.5</b><br>↓ <b>50% ± 10.9</b> | Unknown<br>Vitamin B6 biosynthesis<br>Unknown<br>Unknown <sup>b</sup>      |
| 4                                                                                                  | <i>XBP1</i><br><i>FBP1</i><br><i>ATP18</i>                   | NC             | NC                                        | NC           | ↑ <b>83% ± 50.0</b><br>↑ <b>81% ± 32.1</b><br>↑ <b>46% ± 26.8</b>                        | Transcriptional repressor<br>Gluconeogenesis<br>ATP synthesis <sup>b</sup> |

<sup>a</sup>*Saccharomyces* Genome Database

<sup>b</sup>mitochondrial

<sup>c</sup>endoplasmic reticulum
